# Supplementary material for: Transcriptional regulation of male-sterility in 7B-1 male-sterile tomato mutant
Source: PLoS One. 2017 Feb 8;12(2):e0170715. doi: 10.1371/journal.pone.0170715 (PMC5298235; doi:10.1371/journal.pone.0170715)
Supplement: S3 Table — (XLSX) [file pone.0170715.s003.xlsx]

## Sheet: Table S1
S3 Table. List of differentially expressed genes.
GeneID	FPKM		Statistics		Annotation
	WT	7B-1	Log2	Pr
Solyc00g174330.2.1	1.61	334.71	7.69968	0.999979	Pathogenesis related protein PR-1 (AHRD V1 ***- Q9SC15_SOLTU)
Solyc00g174340.1.1	5.42	887.03	7.35456	1	Pathogenesis-related protein 1b (AHRD V1 ***- Q941G6_SOLTU)
Solyc07g009530.1.1	0.5	49.46	6.62819	0.997786	Chitinase (AHRD V1 ***- Q8MD06_LEUGL)
Solyc01g098490.2.1	0.13	12.45	6.5815	0.956441	Solute carrier family 2 facilitated glucose transporter member 8 (AHRD V1 ***- B6SSR3_MAIZE)
Solyc03g098100.2.1	0.62	37.11	5.90328	0.99531	Reductase 2 (AHRD V1 ***- Q6TY50_HYDMC)
Solyc07g061930.1.1	0.49	29.32	5.90304	0.991933	Unknown Protein (AHRD V1)
Solyc09g008170.1.1	0.26	12.76	5.61706	0.957694	Auxin responsive SAUR protein (AHRD V1 *-*- Q1SN26_MEDTR)
Solyc12g100260.1.1	0.58	27.6	5.57259	0.990718	Fatty acid desaturase (AHRD V1 ***- B3SP99_CAPAN)
Solyc10g017970.1.1	11.59	517.86	5.48156	0.999996	Chitinase (AHRD V1 ***- Q9SQL3_POAPR)
Solyc07g054720.1.1	0.41	18.22	5.47379	0.978433	Proteinase inhibitor type-2 CEVI57 (AHRD V1 ***- IP23_SOLLC)
Solyc10g017980.1.1	2.51	106.99	5.4138	0.999733	Chitinase (AHRD V1 ***- B8QVJ5_ZEAMP)
Solyc01g067300.2.1	0.96	39.32	5.35614	0.995847	UPF0497 membrane protein 13 (AHRD V1 ***- U497D_SOYBN)
Solyc10g078770.1.1	1.44	57.34	5.31542	0.998431	Seed maturation protein LEA 4 (AHRD V1 ***- Q9FE69_GLYTO)
Solyc05g006370.1.1	1.36	51.86	5.25285	0.997975	Unknown Protein (AHRD V1)
Solyc02g078650.2.1	0.4	12.48	4.96347	0.954842	Polyphenol oxidase (AHRD V1 ***- B3WFP2_TAROF)
Solyc10g076670.1.1	0.58	15.64	4.75328	0.970107	Anthocyanidin synthase (AHRD V1 **-- Q2QCX4_GOSHI)
Solyc03g020010.1.1	0.62	15.68	4.6605	0.970081	Kunitz-type trypsin inhibitor alpha chain (AHRD V1 **** ID5A_PROJU)
Solyc12g042800.1.1	3.38	84.15	4.63807	0.999406	Unknown Protein (AHRD V1)
Solyc01g097240.2.1	2.4	54.36	4.50144	0.998123	Pathogenesis-related protein 4B (Fragment) (AHRD V1 **-- Q6LBM4_TOBAC)
Solyc07g007710.2.1	0.78	17.33	4.47379	0.974913	Defensin protein (AHRD V1 ***- B1N684_SOLPI)
Solyc07g052700.2.1	1.7	34.29	4.33414	0.993884	MADS-box transcription factor 1 (AHRD V1 ***- D1MFS6_HEVBR)
Solyc09g018660.1.1	1.74	34.92	4.32697	0.994162	Unknown Protein (AHRD V1)
Solyc09g090990.2.1	0.75	14.75	4.29793	0.965678	Major allergen Mal d 1 (AHRD V1 ***- Q43550_MALDO)
Solyc01g081600.2.1	4.56	85.38	4.22651	0.999378	Non-specific lipid-transfer protein (AHRD V1 ***- Q6E0V1_NICGL)
Solyc12g057060.1.1	6.86	104.79	3.93357	0.99952	UDP-glucuronosyltransferase (AHRD V1 **-- Q5UB81_ARATH)
Solyc01g095960.2.1	2.08	29.45	3.82375	0.990788	Diacylglycerol O-acyltransferase (AHRD V1 ***- A5UW30_ROSS1)
Solyc02g085630.2.1	5.85	78.38	3.74416	0.99893	Homeobox-leucine zipper-like protein (AHRD V1 *-*- Q3HRT1_PICGL)
Solyc08g067630.2.1	2.07	26.27	3.66562	0.987844	Unknown Protein (AHRD V1)
Solyc09g083140.2.1	1.07	13.23	3.62761	0.954876	Unknown Protein (AHRD V1)
Solyc12g005940.1.1	5.37	62.66	3.54473	0.997943	1-aminocyclopropane-1-carboxylate oxidase (AHRD V1 ***- Q94F66_SOLTU)
Solyc02g082920.2.1	11.57	129.7	3.48671	0.999072	Endochitinase (Chitinase) (AHRD V1 **** Q43184_SOLTU)
Solyc03g116200.1.1	1.85	20.5	3.46989	0.979359	Chitin-binding lectin (AHRD V1 ***- B3XYC5_SOLLC)
Solyc10g083580.1.1	1.73	19.1	3.46467	0.976465	Phytosulfokines 5 (AHRD V1 *-*- PSK5_ORYSJ)
Solyc09g091000.2.1	2.31	25.42	3.45943	0.986264	Major allergen Mal d 1 (AHRD V1 ***- Q84LA7_MALDO)
Solyc08g014000.2.1	6.76	68.36	3.33771	0.99752	Lipoxygenase (AHRD V1 **** Q43190_SOLTU)
Solyc08g068730.1.1	1.94	19.07	3.29719	0.975297	N-acetyltransferase (AHRD V1 ***- B6SUK9_MAIZE)
Solyc01g109920.2.1	2.92	27.36	3.22805	0.986774	Dehydrin (AHRD V1 *-*- Q6YL18_BRAJU)
Solyc10g079860.1.1	3.73	34.55	3.21101	0.991226	Beta-1 3-glucanase (AHRD V1 ***- Q68V46_OLEEU)
Solyc04g071100.1.1	1.71	14.43	3.07724	0.95629	Unknown Protein (AHRD V1)
Solyc12g013830.1.1	3.01	25.23	3.06695	0.983129	Unknown Protein (AHRD V1)
Solyc09g089580.2.1	12.58	104.98	3.06005	0.996586	1-aminocyclopropane-1-carboxylate oxidase-like protein (AHRD V1 **-* Q9LTH8_ARATH)
Solyc09g090970.2.1	2.31	19.04	3.04264	0.972455	Major allergen Mal d 1 (AHRD V1 ***- Q84LA7_MALDO)
Solyc01g091170.2.1	27.25	221.59	3.02326	0.996792	Agmatinase (AHRD V1 ***- Q1IPT1_ACIBL)
Solyc07g052720.2.1	2.37	19.17	3.01614	0.972609	MADS-box protein AGL66 (AHRD V1 ***- B6UD66_MAIZE)
Solyc03g098740.1.1	7.88	63.31	3.0054	0.99517	Kunitz trypsin inhibitor (AHRD V1 **** B8Y888_TOBAC)
Solyc12g035520.1.1	1.78	13.73	2.94673	0.950323	Calmodulin-binding transcription activator 1 (AHRD V1 *-*- Q0WQF9_ARATH)
Solyc08g080650.1.1	2.73	19.75	2.854	0.971588	Osmotin-like protein (Fragment) (AHRD V1 **-- Q8S4L1_SOLNI)
Solyc07g008930.1.1	2.57	18.41	2.83996	0.968007	Unknown Protein (AHRD V1)
Solyc03g025670.2.1	2.04	14.32	2.81147	0.951335	PAR-1c protein (AHRD V1 ***- Q43589_TOBAC)
Solyc07g005100.2.1	4.52	31.31	2.79286	0.985305	Chitinase-like protein (AHRD V1 ***- O81861_ARATH)
Solyc06g005900.2.1	3.05	20.72	2.76341	0.972739	Unknown Protein (AHRD V1)
Solyc10g050990.1.1	3.67	24.46	2.73552	0.978401	Unknown Protein (AHRD V1)
Solyc09g072750.2.1	5.57	36.41	2.70929	0.986823	Unknown Protein (AHRD V1)
Solyc07g049140.2.1	5.43	35.03	2.6893	0.985768	Metallocarboxypeptidase inhibitor (AHRD V1 ***- O24639_SOLTU)
Solyc01g108910.2.1	8.86	56.02	2.65992	0.989631	COSII_At2g15890 (Fragment) (AHRD V1 *-*- C0KFD9_9SOLN)
Solyc09g090980.2.1	20.49	128.82	2.65306	0.991882	Major allergen Mal d 1 (AHRD V1 ***- Q84LA7_MALDO)
Solyc03g113950.2.1	3.16	19.6	2.63227	0.966557	Calmodulin-binding protein (AHRD V1 **** Q9FKL6_ARATH)
Solyc06g005890.2.1	3.9	22.98	2.55827	0.971832	Unknown Protein (AHRD V1)
Solyc12g056600.2.1	4.58	26.66	2.54102	0.976507	Short chain alcohol dehydrogenase (AHRD V1 **** O50038_TOBAC)
Solyc03g113980.2.1	3.15	18.25	2.53356	0.960636	Calmodulin-binding protein (AHRD V1 **** Q9FKL6_ARATH)
Solyc01g080870.2.1	3.02	17.4	2.52607	0.957747	Peptide transporter-like protein (AHRD V1 **-* Q9SVS9_ARATH)
Solyc09g006010.2.1	3.7	20.82	2.49313	0.965345	Pathogenesis related protein PR-1 (AHRD V1 ***- Q9SC15_SOLTU)
Solyc05g008160.1.1	5.14	28.42	2.46728	0.975195	Unknown Protein (AHRD V1)
Solyc09g065560.2.1	13.86	74.95	2.43563	0.985821	Sulfate transporter (AHRD V1 **** D7LTZ8_ARALY)
Solyc03g020040.2.1	3.37	17.9	2.40871	0.955008	Proteinase inhibitor II (AHRD V1 ***- B3F0C1_TOBAC)
Solyc09g011590.2.1	3.63	19.21	2.40327	0.958543	Glutathione S-transferase-like protein (AHRD V1 **** A8DUB0_SOLLC)
Solyc04g071770.2.1	3.8	20.05	2.40054	0.960759	Ethylene responsive transcription factor 2a (AHRD V1 *-*- C0J9I7_9ROSA)
Solyc10g080670.1.1	13.98	73.28	2.38957	0.984836	Unknown Protein (AHRD V1)
Solyc12g010070.1.1	64.29	334.23	2.37851	0.985793	Unknown Protein (AHRD V1)
Solyc02g067750.2.1	100.46	518.15	2.36737	0.985744	Carbonic anhydrase (AHRD V1 ***- B1VK36_SOLLC)
Solyc02g062390.2.1	16.88	86.85	2.36457	0.98485	Unknown Protein (AHRD V1)
Solyc03g097840.2.1	3.81	19.55	2.35896	0.958434	Mitochondrial phosphate carrier protein (AHRD V1 **** B9GFH9_POPTR)
Solyc02g069110.2.1	23.3	118.79	2.3505	0.985303	Cathepsin B (AHRD V1 ***- Q1HER6_NICBE)
Solyc04g074770.2.1	17.88	90.17	2.33342	0.984795	Unknown Protein (AHRD V1)
Solyc02g078910.2.1	12.6	63.29	2.32769	0.983592	Endonuclease (AHRD V1 **** Q6B782_SOLTU)
Solyc05g051480.2.1	5.86	28.59	2.28688	0.971988	Unknown Protein (AHRD V1)
Solyc01g090310.2.1	14.46	69.21	2.26003	0.983364	Ethylene responsive transcription factor 1a (AHRD V1 *-*- C0J9I9_9ROSA)
Solyc04g005610.2.1	11.45	54.7	2.25701	0.981912	NAC domain transcription factor (AHRD V1 **** Q5DM36_WHEAT)
Solyc11g020960.1.1	336.08	1601.81	2.25399	0.984732	Proteinase inhibitor II (AHRD V1 ***- B3F0C1_TOBAC)
Solyc08g080590.2.1	4.82	22.92	2.25096	0.963992	Osmotin 81 (Fragment) (AHRD V1 **-- Q84ML3_SOLTU)
Solyc10g084320.1.1	25.23	119.79	2.24793	0.98435	Subtilisin-like protease (AHRD V1 **-- O82777_SOLLC)
Solyc02g036480.1.1	7.88	37.33	2.24489	0.976611	Harpin-induced protein-like (Fragment) (AHRD V1 **-- D2CFH8_COFAR)
Solyc01g010250.2.1	6.62	31.34	2.24184	0.973181	6-phosphogluconolactonase (AHRD V1 ***- B6U0H2_MAIZE)
Solyc12g038550.1.1	6.38	29.81	2.22342	0.971633	Cleavage stimulation factor subunit 1-like protein (AHRD V1 *-*- Q9FME6_ARATH)
Solyc01g008610.2.1	7.29	33.75	2.21101	0.973928	Beta-1 3-glucanase (AHRD V1 ***- Q9SYX6_TOBAC)
Solyc09g090620.1.1	4.5	20.83	2.21101	0.958231	CC-NBS-LRR class disease resistance protein (AHRD V1 ***- C6FF62_SOYBN)
Solyc10g085470.1.1	6.7	30.95	2.20789	0.97196	Unknown Protein (AHRD V1)
Solyc04g076700.2.1	5.75	26.16	2.18587	0.966487	MADS-box transcription factor-like protein (AHRD V1 ***- Q9M2M4_ARATH)
Solyc02g082930.2.1	18.81	84.94	2.17632	0.981785	Endochitinase (Chitinase) (AHRD V1 **** Q43184_SOLTU)
Solyc10g075160.1.1	73.82	325.45	2.14078	0.982199	Ferredoxin I (AHRD V1 ***- Q93XJ9_SOLTU)
Solyc04g076690.2.1	16.03	70.26	2.13093	0.978891	Unknown Protein (AHRD V1)
Solyc03g098710.1.1	109.14	468.85	2.10434	0.979496	Kunitz-type proteinase inhibitor A4 (Fragment) (AHRD V1 **** C5IWR3_SOLBR)
Solyc02g088340.2.1	6.9	29.51	2.09761	0.9662	WRKY transcription factor-c (AHRD V1 **** Q5DJV3_CAPAN)
Solyc02g071700.2.1	13.33	56.78	2.09085	0.976327	GDSL esterase/lipase At1g29670 (AHRD V1 ***- GDL15_ARATH)
Solyc01g109090.2.1	20.32	85.23	2.06695	0.974826	Unknown Protein (AHRD V1)
Solyc07g007930.2.1	8.93	37.4	2.06695	0.9671	Alkaline alpha galactosidase 2 (AHRD V1 **-- Q575Z7_MAIZE)
Solyc02g077370.1.1	8.93	37.09	2.05311	0.96633	Ethylene-responsive transcription factor 2 (AHRD V1 ***- B6SSU7_MAIZE)
Solyc05g007770.2.1	9.29	38.45	2.04963	0.966916	NAC domain transcription factor (AHRD V1 **** Q5DM36_WHEAT)
Solyc05g012050.2.1	7.92	32.7	2.04614	0.963636	CRABS CLAW (Fragment) (AHRD V1 ***- Q5EMM8_GOSHI)
Solyc03g005890.1.1	6.94	28.58	2.04264	0.96016	Genomic DNA chromosome 5 P1 clone MRA19 (AHRD V1 **-- Q9FK78_ARATH)
Solyc03g098760.1.1	63.34	260.62	2.03914	0.974622	Kunitz-type protease inhibitor-like protein (AHRD V1 ***- Q2XPY0_SOLTU)
Solyc08g066890.2.1	14.79	60.68	2.03562	0.971983	Unknown Protein (AHRD V1)
Solyc08g074680.2.1	37.66	151.69	2.01078	0.973404	Polyphenol oxidase (AHRD V1 *-*- Q41428_SOLTU)
Solyc05g006980.2.1	9.35	37.39	2	0.963995	Homeobox-leucine zipper-like protein (AHRD V1 *-*- Q3HRT1_PICGL)
Solyc10g005320.2.1	8.45	33.4	1.98185	0.961012	Tryptophan synthase beta chain 1 (AHRD V1 **** Q0WUI8_ARATH)
Solyc01g006320.2.1	7.49	28.29	1.91839	0.950302	Non-race specific disease resistance protein 1-like protein b (AHRD V1 ***- D2CFI3_COFAR)
Solyc03g031600.2.1	14.28	53.76	1.91073	0.962063	Peroxisomal membrane protein PMP22 (AHRD V1 ***- B6TFH7_MAIZE)
Solyc07g006380.2.1	3666.62	13756.1	1.90689	0.965937	Defensin-like protein (AHRD V1 ***- Q948T3_PYRPY)
Solyc12g013620.1.1	9.83	36.64	1.89918	0.956513	NAC domain protein IPR003441 (AHRD V1 ***- B9N1K9_POPTR)
Solyc00g071180.2.1	239.56	891.96	1.8953	0.965899	Cysteine proteinase inhibitor (AHRD V1 *-** Q2VY67_9ERIC)
Solyc04g071070.2.1	72.8	271.14	1.8953	0.965848	Unknown Protein (AHRD V1)
Solyc01g086800.2.1	27.69	100.94	1.8679	0.961806	Histone H3 (AHRD V1 **** Q53NE3_ORYSJ)
Solyc08g066880.2.1	47.67	173.15	1.85997	0.962413	S-adenosylhomocysteine nucleosidase (AHRD V1 *-*- D6E0Z8_9FIRM)
Solyc09g007940.2.1	10.14	36.8	1.85997	0.953119	Adenosine kinase (AHRD V1 **** D2D2Z6_GOSHI)
Solyc08g062960.2.1	14.92	53.99	1.85599	0.958577	Heat stress transcription factor A3 (AHRD V1 *-** D1M7W9_SOLLC)
Solyc05g053760.2.1	18.64	66.09	1.82782	0.959326	Chaperone protein dnaJ 20 (AHRD V1 ***- B6U349_MAIZE)
Solyc01g107100.2.1	10.24	36.17	1.81967	0.951754	Beta-1 4-xylosidase (AHRD V1 ***- D7LA14_ARALY)
Solyc08g006770.2.1	16.11	56.33	1.80735	0.957174	Anthocyanidin synthase (Fragment) (AHRD V1 **-* P93120_DIACA)
Solyc09g089490.2.1	402.03	1390.6	1.79077	0.959923	Proteinase inhibitor I (AHRD V1 ***- Q3S492_SOLTU)
Solyc07g049530.2.1	89.13	298.48	1.74416	0.958916	1-aminocyclopropane-1-carboxylate oxidase (AHRD V1 ***- Q94F66_SOLTU)
Solyc07g024000.2.1	22.1	72.99	1.72247	0.956016	Dehydrogenase/ reductase 3 (AHRD V1 *--* Q3INM6_NATPD)
Solyc01g079200.2.1	32.7925	152.495	1.7	0.981912	Gibberellin 2-oxidase (AHRD V1 *--*A4GVL8_SOLLC)
Solyc02g071430.2.1	32.33	103.34	1.67807	0.955944	1-aminocyclopropane-1-carboxylate oxidase (AHRD V1 **-- ACCO_ACTDE)
Solyc05g016060.2.1	36.58	114.72	1.65076	0.953626	Unknown Protein (AHRD V1)
Solyc09g089540.2.1	128.42	400.27	1.64155	0.953486	Proteinase inhibitor I (AHRD V1 ***- Q3S492_SOLTU)
Solyc01g006390.2.1	54.2	166.88	1.62293	0.953021	Cysteine-rich extensin-like protein-4 (AHRD V1 *-*- Q08197_TOBAC)
Solyc02g093580.2.1	46.27	140.95	1.60881	0.952433	Pectate lyase (AHRD V1 **** Q9M505_VITVI)
Solyc00g187050.2.1	817.27	2478.06	1.59932	0.952673	Leucyl aminopeptidase (AHRD V1 ***- D7DWG6_NOSA0)
Solyc02g084240.2.1	79.24	237.08	1.58015	0.950985	H1 histone-like protein (AHRD V1 ***- Q43511_SOLLC)
Solyc01g097520.2.1	91.29	270.79	1.57046	0.950858	Annexin 11 (AHRD V1 ***- D6QX28_SOYBN)
Solyc02g069100.2.1	42.16	125.36	1.57046	0.950389	Cathepsin B (AHRD V1 ***- Q1HER6_NICBE)
Solyc09g089510.2.1	1297.11	3833.45	1.5656	0.950543	Proteinase inhibitor I (AHRD V1 ***- Q3S492_SOLTU)
Solyc05g007080.2.1	220.48	76.46	-1.51457	0.950316	Pectate lyase family protein (AHRD V1 **** D7M6R5_ARALY)
Solyc06g084620.1.1	993.77	346.44	-1.51457	0.950267	Pectinesterase (AHRD V1 ***- B9GEY5_POPTR)
Solyc01g066420.2.1	782.65	272.96	-1.51457	0.950263	Pectinesterase (AHRD V1 ***- Q4G2Z0_TOBAC)
Solyc01g011050.2.1	625.51	218.06	-1.51457	0.950253	LRR receptor-like serine/threonine-protein kinase, RLP
Solyc05g055710.2.1	202.81	70.82	-1.51457	0.950121	Laccase-3 (AHRD V1 **-- LAC3_ARATH)
Solyc07g045090.2.1	172.77	60.13	-1.51457	0.950053	Alcohol dehydrogenase zinc-binding domain protein (AHRD V1 **-* D2QM87_SPILD)
Solyc06g008680.2.1	405.27	136	-1.55639	0.952643	Unknown Protein (AHRD V1)
Solyc02g068740.2.1	106.13	35.61	-1.55639	0.951849	Glycine cleavage system H protein 1 (AHRD V1 ***- B6UHJ7_MAIZE)
Solyc11g005980.1.1	116.64	39.29	-1.55639	0.951185	Glucan synthase like 3 (AHRD V1 ***- D8QQF0_SELML)
Solyc02g069300.1.1	495.67	168.21	-1.55639	0.951061	Unknown Protein (AHRD V1)
Solyc12g062920.1.1	4046.64	1380.08	-1.55639	0.95093	Unknown Protein (AHRD V1)
Solyc06g084600.1.1	631.86	206.19	-1.59946	0.953507	Unknown Protein (AHRD V1)
Solyc02g093570.2.1	502.86	163.89	-1.59946	0.953496	Unknown Protein (AHRD V1)
Solyc09g090070.1.1	219.28	71.79	-1.59946	0.953337	Inorganic phosphate transporter (AHRD V1 **** O22548_SOLLC)
Solyc01g066810.2.1	660.09	218.48	-1.59946	0.953231	Universal stress protein (AHRD V1 ***- B4UW73_ARAHY)
Solyc02g067450.2.1	694.88	229.95	-1.59946	0.953231	Pectate lyase family protein (AHRD V1 **** D7M6R5_ARALY)
Solyc06g073010.2.1	700.22	232.38	-1.59946	0.952807	PGPS/D3 (AHRD V1 ***- Q9ZTN4_PETHY)
Solyc11g005200.1.1	90.49	29.6	-1.59946	0.952216	Prolyl 4-hydroxylase alpha-2 subunit (AHRD V1 ***- B6TD48_MAIZE)
Solyc01g094320.2.1	89.82	29.55	-1.59946	0.95218	Cysteine and glycine-rich protein 3 (AHRD V1 **-- D2SQP3_PIG)
Solyc12g088830.1.1	73.5	23.96	-1.59946	0.951478	Myosin heavy chain-like (AHRD V1 **-- Q8LHQ6_ORYSJ)
Solyc02g089660.1.1	79.12	26.34	-1.59946	0.951074	Unknown Protein (AHRD V1)
Solyc11g012410.1.1	68.23	22.45	-1.59946	0.950648	Inositol monophosphatase 3 (AHRD V1 ***- B6TEX0_MAIZE)
Solyc05g005030.2.1	191.99	60.96	-1.64386	0.956643	Unknown Protein (AHRD V1)
Solyc09g091030.2.1	135.75	42.96	-1.64386	0.956403	Beta-amylase (AHRD V1 **** E0AE02_SOLLC)
Solyc05g055720.1.1	351.1	112.87	-1.64386	0.954325	L-ascorbate oxidase (AHRD V1 ***- B6U2Y1_MAIZE)
Solyc06g076090.2.1	363.15	116.8	-1.64386	0.954325	Actin (AHRD V1 ***- B5M4V6_TOBAC)
Solyc06g008650.2.1	339.48	103.73	-1.68966	0.958683	Pollen allergen Ole e 6 (AHRD V1 *-*- ALL6_OLEEU)
Solyc03g058430.1.1	119.75	36.65	-1.68966	0.958197	Omega-6 fatty acid desaturase (AHRD V1 **** Q461Q1_HEVBR)
Solyc06g071400.2.1	653.18	202.44	-1.68966	0.957604	RAG1-activating protein 1 homolog (AHRD V1 **-- R1AP1_CAEBR)
Solyc04g007840.2.1	197.61	61.12	-1.68966	0.957483	Senescence-associated protein (AHRD V1 ***- B6TMS7_MAIZE)
Solyc10g085550.1.1	183.61	57.49	-1.68966	0.957312	Enolase (AHRD V1 ***- C5J0G6_TOBAC)
Solyc03g116530.2.1	82.79	25.38	-1.68966	0.957284	Glyoxalase/bleomycin resistance protein/dioxygenase (AHRD V1 ***- Q2HVV5_MEDTR)
Solyc10g078940.1.1	70.28	21.65	-1.68966	0.955821	Receptor-like kinase (AHRD V1 ***- A7VM24_MARPO)
Solyc06g071290.2.1	59.46	18.65	-1.68966	0.95345	Betaine aldehyde dehydrogenase (AHRD V1 **** D2DEK8_LYCBA)
Solyc11g012020.1.1	51.09	16.03	-1.68966	0.951934	EH-domain-containing protein 1 (AHRD V1 **-* B6U193_MAIZE)
Solyc10g005820.1.1	44.2	13.73	-1.68966	0.950788	Farnesyl pyrophosphate synthase (AHRD V1 ***- O65004_SOLLC)
Solyc10g017620.2.1	435.54	129.42	-1.73697	0.959473	5-dehydro-2-deoxygluconokinase 1 (AHRD V1 **-- IOLC1_BACCZ)
Solyc06g084170.2.1	416.32	123.53	-1.73697	0.95947	Unknown Protein (AHRD V1)
Solyc05g005550.2.1	474.34	143.4	-1.73697	0.95904	BURP domain-containing protein (Fragment) (AHRD V1 *--- C1PI44_ARATH)
Solyc01g080970.2.1	84.07	25.13	-1.73697	0.958108	Carboxyl methyltransferase 4 (AHRD V1 **** B0ZB58_HUMLU)
Solyc02g032940.2.1	93.16	28.34	-1.73697	0.957934	Aspartic proteinase (AHRD V1 **-* Q8L6A8_THECC)
Solyc08g082480.2.1	67.83	20.12	-1.73697	0.957201	Phosphatidylinositol 3-and 4-kinase family (Fragment) (AHRD V1 *--* A6N0X2_ORYSI)
Solyc01g111640.2.1	66.53	20.16	-1.73697	0.956458	Skp1 (AHRD V1 ***- Q49HP3_CAPAN)
Solyc02g088320.2.1	58.88	17.65	-1.73697	0.956104	cDNA clone J075153F01 full insert sequence (AHRD V1 **-- B7F9A7_ORYSJ)
Solyc09g074530.2.1	57.17	16.99	-1.73697	0.955902	MTN3 (AHRD V1 **-- B6T9U6_MAIZE)
Solyc10g052510.1.1	48.47	14.63	-1.73697	0.9537	Isoflavone reductase-like protein 5 (AHRD V1 ***- Q3KN68_VITVI)
Solyc01g110060.2.1	44.45	13.13	-1.73697	0.953172	Purple acid phosphatase (AHRD V1 **** Q84KZ2_TOBAC)
Solyc01g103790.2.1	46.4	13.99	-1.73697	0.953144	Wall-associated receptor kinase-like 9 (AHRD V1 ***- WAKLH_ARATH)
Solyc06g076450.2.1	42.49	12.94	-1.73697	0.95163	Ras-related protein Rab-25 (AHRD V1 ***- RAB25_MOUSE)
Solyc01g106830.2.1	40.65	12.29	-1.73697	0.95103	Phytosulfokines 4 (AHRD V1 *-*- B6UIM4_MAIZE)
Solyc01g068110.2.1	1244.81	358.69	-1.78588	0.961765	Unknown Protein (AHRD V1)
Solyc10g054100.1.1	101.63	28.97	-1.78588	0.96112	EDS5 (AHRD V1 ***- D6BM32_SOYBN)
Solyc01g005510.2.1	1195.35	344.84	-1.78588	0.960976	Laccase-2 (AHRD V1 **-- LAC2_ORYSJ)
Solyc06g084180.2.1	680.79	197.53	-1.78588	0.960971	Pollen allergen Ole e 6 (AHRD V1 ***- ALL6_OLEEU)
Solyc09g009720.1.1	118.62	34.61	-1.78588	0.960362	Ubiquitin-conjugating enzyme 13 E2 (AHRD V1 **** D8QMV8_SELML)
Solyc08g066360.2.1	93.92	27.43	-1.78588	0.959899	Malic enzyme (AHRD V1 ***- B9RKI6_RICCO)
Solyc11g065530.1.1	66.45	19.25	-1.78588	0.9586	Lipase (Fragment) (AHRD V1 ***- Q9ZTW1_DIACA)
Solyc09g092490.2.1	62.33	18.33	-1.78588	0.957059	UDP-glucosyltransferase family 1 protein (AHRD V1 **** C6KI44_CITSI)
Solyc08g077180.2.1	46.79	13.43	-1.78588	0.956212	Pyruvate kinase (AHRD V1 **** Q53WS7_TOBAC)
Solyc09g091610.2.1	42.33	12.09	-1.78588	0.954921	Vesicle-associated membrane protein 7B (AHRD V1 **-- D7KE74_ARALY)
Solyc02g067740.2.1	46.86	13.81	-1.78588	0.9539	Genomic DNA chromosome 3 TAC clone K24A2 (AHRD V1 ***- Q9LIJ1_ARATH)
Solyc09g008060.2.1	42.29	12.33	-1.78588	0.953787	UDP-glucosyltransferase family 1 protein (AHRD V1 **** C6KI44_CITSI)
Solyc01g068120.2.1	1111.88	306.85	-1.8365	0.964506	Pectinesterase (AHRD V1 ***- B9S005_RICCO)
Solyc12g014240.1.1	1189.1	327.58	-1.8365	0.964506	Pollen allergen Phl p 11 (AHRD V1 ***- B6TNI5_MAIZE)
Solyc02g087670.2.1	602.93	166.1	-1.8365	0.964498	Pectate lyase family protein (AHRD V1 **** D7M6R5_ARALY)
Solyc03g078260.2.1	729.47	204.85	-1.8365	0.962551	Pectinacetylesterase (Fragment) (AHRD V1 *--- C6JT68_9MYRT)
Solyc10g051380.1.1	435.28	124.02	-1.8365	0.961853	Glycine-rich RNA-binding protein (AHRD V1 **** B2YKT9_TOBAC)
Solyc02g088710.2.1	90.88	25.75	-1.8365	0.960884	4-coumarate CoA ligase-like (AHRD V1 **** Q84K86_NICSY)
Solyc08g060930.2.1	72.91	20.68	-1.8365	0.960114	Gibberellin receptor GID1L2 (AHRD V1 **-- B6T2M3_MAIZE)
Solyc03g098500.2.1	61.02	17.36	-1.8365	0.958978	Arf-GAP with GTPase, ANK repeat and PH domain-containing protein 1 (AHRD V1 *--- AGAP1_XENLA)
Solyc10g005300.2.1	55.9	15.82	-1.8365	0.958277	Serine/threonine-protein kinase (AHRD V1 **** C6ZRV0_SOYBN)
Solyc04g064770.1.1	38.67	10.66	-1.8365	0.956259	Zinc finger CCCH domain-containing protein 38 (AHRD V1 *-*- C3H38_ARATH)
Solyc11g045230.1.1	36.54	10.09	-1.8365	0.955127	Tripartite motif-containing 22 (Predicted) (AHRD V1 *-*- B0VXD4_CALJA)
Solyc07g017230.2.1	164.9	43.75	-1.88897	0.969858	Receptor like kinase, RLK
Solyc06g064480.2.1	583.44	155.47	-1.88897	0.9694	Protein TAP1 (AHRD V1 -**- TAP1_ANTMA)
Solyc03g058450.2.1	136.17	36.24	-1.88897	0.969109	Glucan endo-1 3-beta-glucosidase 5 (AHRD V1 ***- B6SXV6_MAIZE)
Solyc03g058910.2.1	836.3	228.17	-1.88897	0.965899	Pectate lyase (AHRD V1 **** B6TPL1_MAIZE)
Solyc08g006290.1.1	953.12	258.4	-1.88897	0.965899	Unknown Protein (AHRD V1)
Solyc09g007780.1.1	746.44	205.08	-1.88897	0.964589	Unknown Protein (AHRD V1)
Solyc01g111160.2.1	658.29	179.82	-1.88897	0.964585	Unknown Protein (AHRD V1)
Solyc03g058400.2.1	78.17	21.01	-1.88897	0.964555	Aspartyl protease family protein (AHRD V1 **-- D7KF83_ARALY)
Solyc01g066360.2.1	281.53	77.25	-1.88897	0.964542	Pectinesterase (AHRD V1 ***- Q4G2Z0_TOBAC)
Solyc12g010360.1.1	254.78	69.56	-1.88897	0.96453	H-ATPase (AHRD V1 ***- Q8L6I3_ORYSJ)
Solyc05g050090.2.1	214.42	58.68	-1.88897	0.964494	Delta-6 fatty acid desaturase (AHRD V1 **** A3QNP9_9BORA)
Solyc08g081970.2.1	40.99	10.93	-1.88897	0.962349	Arabinogalactan peptide 22 (AHRD V1 --*- AGP22_ARATH)
Solyc06g072780.1.1	62.91	17.25	-1.88897	0.961965	Unknown Protein (AHRD V1)
Solyc01g090110.1.1	52.15	14.21	-1.88897	0.961778	Bax inhibitor 1 (AHRD V1 ***- C6GAD3_CAPAN)
Solyc04g080540.2.1	43.22	11.57	-1.88897	0.959734	ST225 (AHRD V1 ***- B4YYB7_THEHA)
Solyc06g054270.2.1	995.78	255.19	-1.94342	0.97196	Solute carrier family 2, facilitated glucose transporter member 5 (AHRD V1 ***- GTR5_BOVIN)
Solyc10g007270.2.1	1810.5	461.73	-1.94342	0.97196	Pollen allergen Phl p 11 (AHRD V1 ***- B6TNI5_MAIZE)
Solyc10g079100.1.1	172.35	43.99	-1.94342	0.971803	Unknown Protein (AHRD V1)
Solyc05g050700.1.1	169.06	43.2	-1.94342	0.971796	LRR receptor-like serine/threonine-protein kinase, RLP
Solyc03g058890.2.1	164.38	42.03	-1.94342	0.971792	Pectate lyase family protein (AHRD V1 **** D7LQ55_ARALY)
Solyc01g099820.2.1	436.41	113.07	-1.94342	0.971306	Hypoxia induced protein conserved region containing protein (AHRD V1 ***- B6TGV9_MAIZE)
Solyc12g005320.1.1	1406.91	367.81	-1.94342	0.971268	Pectinacetylesterase (Fragment) (AHRD V1 *--- C6JT68_9MYRT)
Solyc05g013980.2.1	372.92	97.55	-1.94342	0.971238	Unknown Protein (AHRD V1)
Solyc03g044010.2.1	59.94	15.37	-1.94342	0.969164	Mitochondrial porin (Voltage-dependent anion channel) outer membrane protein (AHRD V1 **** C4R1Z2_PICPG)
Solyc11g008680.1.1	59.55	15.49	-1.94342	0.968402	Acyl- (AHRD V1 ***- Q4JIJ4_9ROSI)
Solyc06g053380.2.1	66.55	17.63	-1.94342	0.967892	Chitinase (AHRD V1 ***- D0QU15_LACSA)
Solyc04g080890.2.1	51.07	13.09	-1.94342	0.967854	2-oxoglutarate and iron-dependent oxygenase domain-containing protein 2 (AHRD V1 **-- OGFD2_HUMAN)
Solyc06g071700.1.1	43.76	11.29	-1.94342	0.96598	Primary amine oxidase (AHRD V1 **** B4WL51_9SYNE)
Solyc02g082300.2.1	37.55	9.68	-1.94342	0.963547	AT-hook motif nuclear localized protein 2 (AHRD V1 *-*- A1A6F0_ORYSJ)
Solyc03g116990.1.1	30.97	7.93	-1.94342	0.959473	Protein transport protein Sec61 beta subunit (AHRD V1 *-*- B6UEM6_MAIZE)
Solyc01g044240.2.1	28.84	7.39	-1.94342	0.957577	Unknown Protein (AHRD V1)
Solyc06g053950.1.1	25.42	6.51	-1.94342	0.953501	Heat stress transcription factor A-2c (AHRD V1 *-*- HFA2C_ORYSJ)
Solyc08g066750.2.1	107.07	26.73	-2	0.973559	Major facilitator superfamily domain containing protein 5 (AHRD V1 ***- B2W8V3_PYRTR)
Solyc11g032100.1.1	74.63	18.71	-2	0.97262	MADS box transcription factor (AHRD V1 ***- B2KJ31_POPTO)
Solyc08g007940.2.1	117.71	29.79	-2	0.972043	LIM domain protein 2b (AHRD V1 **-- B1PVT0_TOBAC)
Solyc06g062690.2.1	73.48	18.69	-2	0.970884	Nucleosome assembly protein 1-like protein 4 (AHRD V1 ***- Q70Z16_TOBAC)
Solyc01g104780.2.1	54.73	13.66	-2	0.970756	Nodulin-related integral membrane protein DUF125 (AHRD V1 *-*- C7JBI4_ACEP3)
Solyc08g062780.1.1	48.3	12.01	-2	0.969574	BHLH transcription factor (AHRD V1 **** Q84WX1_BRANA)
Solyc04g077840.2.1	39.26	9.78	-2	0.966761	F-box/kelch-repeat protein At5g43190 (AHRD V1 *-*- FK119_ARATH)
Solyc08g007390.2.1	36.66	9.12	-2	0.965606	Vesicle-associated membrane protein-associated protein (AHRD V1 **-- Q1ANA7_WHEAT)
Solyc12g035710.1.1	33.64	8.48	-2	0.963226	Cbs domain containing protein expressed (Fragment) (AHRD V1 *--- A6N095_ORYSI)
Solyc09g010140.1.1	29.21	7.37	-2	0.959704	Arabidopsis thaliana genomic DNA chromosome 5 P1 clone MOK16 (AHRD V1 *--- Q9LYW2_ARATH)
Solyc02g085170.2.1	26.04	6.46	-2	0.956898	Glucose transporter 8 (AHRD V1 ***- Q2KKJ3_SOLIN)
Solyc06g072770.2.1	24.53	6.18	-2	0.95397	RNA recognition motif-containing protein (AHRD V1 **-- D7M9G3_ARALY)
Solyc03g116630.2.1	22.36	5.62	-2	0.950098	Unknown Protein (AHRD V1)
Solyc00g257110.2.1	1309.4	307.94	-2.05889	0.979526	H-ATPase (AHRD V1 **** Q8L6I3_ORYSJ)
Solyc01g009590.2.1	1167.31	276.31	-2.05889	0.979513	A9-like protein (Fragment) (AHRD V1 **-- A4L798_SINAL)
Solyc10g055470.1.1	1629.63	388.38	-2.05889	0.979384	Beta-galactosidase (AHRD V1 **** B2LYJ4_PETHY)
Solyc06g005390.1.1	101.64	24.01	-2.05889	0.978876	Histone H2B (AHRD V1 ***- D7LK79_ARALY)
Solyc01g100920.2.1	71.2	17.17	-2.05889	0.974251	Nodulin-like protein (AHRD V1 ***- Q84TV1_GOSHI)
Solyc10g005750.2.1	33.8	8.21	-2.05889	0.965292	Calcium-dependent protein kinase (AHRD V1 **-* B2KTA9_WHEAT)
Solyc04g072760.2.1	27.49	6.66	-2.05889	0.960647	High affinity sulfate transporter 2 (AHRD V1 **** SUT2_STYHA)
Solyc10g078820.1.1	25.66	6.17	-2.05889	0.959027	Protein phosphatase 2c-like protein (AHRD V1 ***- Q8S2S5_THEHA)
Solyc12g098450.1.1	23.62	5.64	-2.05889	0.958885	DUF803 domain membrane protein (AHRD V1 **-- Q4WRL6_ASPFU)
Solyc04g015430.2.1	21.25	5.07	-2.05889	0.954254	Os06g0724200 protein (Fragment) (AHRD V1 ***- Q0D9E9_ORYSJ)
Solyc11g065990.1.1	156.63	35.38	-2.12029	0.982632	Actin (AHRD V1 ***- B5M4V6_TOBAC)
Solyc06g008670.2.1	1477.21	337.2	-2.12029	0.982265	Unknown Protein (AHRD V1)
Solyc09g010090.2.1	697.2	159.42	-2.12029	0.982263	Beta-fructofuranosidase insoluble isoenzyme 2 (AHRD V1 **-- B6U1H5_MAIZE)
Solyc01g086830.2.1	660.32	151.75	-2.12029	0.982231	Protease inhibitor/seed storage/lipid transfer protein family protein (AHRD V1 **** D7L6K8_ARALY)
Solyc01g107910.2.1	103.3	23.67	-2.12029	0.981662	Caffeoyl CoA 3-O-methyltransferase (AHRD V1 **** Q5I2D1_9ROSI)
Solyc12g006500.1.1	101.83	23.47	-2.12029	0.981607	Phosphate translocator protein (AHRD V1 **-- A2PZC5_CHLRE)
Solyc03g118750.2.1	67.57	15.43	-2.12029	0.980464	Phosphoethanolamine N-methyltransferase (AHRD V1 **** Q9AXH3_SOLLC)
Solyc03g006360.2.1	101.8	23.65	-2.12029	0.979955	Auxin-repressed protein (AHRD V1 ***- Q6PXE1_9SOLN)
Solyc11g011440.1.1	54.56	12.61	-2.12029	0.979006	Aspartic proteinase nepenthesin-1 (AHRD V1 **-- B6TS94_MAIZE)
Solyc11g018600.1.1	47.15	10.81	-2.12029	0.977677	3-phenylpropionate-dihydrodiol/cinnamic acid-dihydrodiol dehydrogenase (AHRD V1 *-*- HCAB_ECO5E)
Solyc10g018640.1.1	41.51	9.41	-2.12029	0.976166	Zinc ion binding protein (AHRD V1 ***- D7LRR6_ARALY)
Solyc06g076930.1.1	42.47	9.94	-2.12029	0.974633	ABC transporter G family member 31 (AHRD V1 ***- AB31G_ARATH)
Solyc09g082270.2.1	37.33	8.62	-2.12029	0.974352	Non-specific lipid-transfer protein (AHRD V1 ***- B9SFJ1_RICCO)
Solyc06g072320.2.1	40.77	9.46	-2.12029	0.974145	8-amino-7-oxononanoate synthase (AHRD V1 **-- Q113V0_TRIEI)
Solyc00g007010.2.1	39.9	9.28	-2.12029	0.97379	Phosphatidylinositol phosphate (PtdInsP) phosphatase involved in hydrolysis of PtdIns (AHRD V1 **** D6VWZ1_YEAST)
Solyc03g116610.2.1	33.72	7.61	-2.12029	0.973185	Ethylene-responsive transcription factor 7 (AHRD V1 *-** ERF83_ARATH)
Solyc02g076900.2.1	34.65	7.85	-2.12029	0.973136	Dual specificity protein phosphatase (AHRD V1 ***- Q2HSZ6_MEDTR)
Solyc02g082860.2.1	33.32	7.8	-2.12029	0.970474	Isocitrate dehydrogenase (AHRD V1 **** A3LYS8_PICST)
Solyc12g005460.1.1	30.43	7.15	-2.12029	0.967258	Rapid alkalinization factor 1 (AHRD V1 *--- Q84UC9_9ROSI)
Solyc12g010950.1.1	26.12	6.05	-2.12029	0.96409	Alcohol dehydrogenase zinc-containing (AHRD V1 **-- Q9A6R7_CAUCR)
Solyc09g082380.2.1	26.81	6.29	-2.12029	0.963765	ATP-dependent RNA helicase (AHRD V1 **** Q10D00_ORYSJ)
Solyc06g065380.2.1	23.97	5.43	-2.12029	0.962948	Calcium-dependent protein kinase 4 (AHRD V1 **** D7LXA9_ARALY)
Solyc10g050450.1.1	21.52	4.87	-2.12029	0.958959	Expp1 protein (AHRD V1 ***- B6T683_MAIZE)
Solyc01g008240.2.1	669.87	145.5	-2.18442	0.98405	Solute carrier family 2, facilitated glucose transporter member 3 (AHRD V1 ***- GTR3_BOVIN)
Solyc01g056310.2.1	1860.35	407.77	-2.18442	0.983549	Laccase-2 (AHRD V1 **-- LAC2_ORYSJ)
Solyc10g079910.1.1	285.05	63.56	-2.18442	0.982829	Solute carrier family 35 member E1 (AHRD V1 **-- B7ZTJ7_XENTR)
Solyc06g053990.1.1	81.56	17.84	-2.18442	0.98246	Unknown Protein (AHRD V1)
Solyc07g052620.1.1	116.8	26.14	-2.18442	0.982435	Zinc finger protein CONSTANS-LIKE 4 (AHRD V1 *-*- COL4_ARATH)
Solyc01g068080.2.1	79.8	17.78	-2.18442	0.981694	Dihydroflavonol 4-reductase family (AHRD V1 ***- D7MD06_ARALY)
Solyc04g014760.2.1	63.61	14	-2.18442	0.981494	RHO protein GDP dissociation inhibitor (AHRD V1 **** Q705X3_MEDTR)
Solyc07g049280.2.1	57.05	12.76	-2.18442	0.980016	Diphosphate-fructose-6-phosphate 1-phosphotransferase (AHRD V1 ***- D0TAW1_9BACE)
Solyc08g083090.1.1	45.21	9.79	-2.18442	0.979401	Susceptibility homeodomain transcription factor (Fragment) (AHRD V1 ***- Q8SAA7_ORYSA)
Solyc06g008500.2.1	41.71	9	-2.18442	0.978452	Ankyrin repeat-containing protein (AHRD V1 *-*- D2Y4N3_TOBAC)
Solyc10g008030.2.1	29.52	6.42	-2.18442	0.971578	Os06g0207500 protein (Fragment) (AHRD V1 ***- Q0DDQ9_ORYSJ)
Solyc01g099530.2.1	25.76	5.57	-2.18442	0.967941	Pentatricopeptide repeat-containing protein (AHRD V1 *-*- D7M6N0_ARALY)
Solyc02g036440.2.1	27.07	6.05	-2.18442	0.967869	Cell cycle control protein (AHRD V1 **-- Q2UBE9_ASPOR)
Solyc07g014640.2.1	23.48	5.07	-2.18442	0.96467	Galactokinase-like protein (AHRD V1 ***- Q9SG76_ARATH)
Solyc03g117660.2.1	23.64	5.15	-2.18442	0.964619	Mandelonitrile lyase (AHRD V1 *-*- B6SVJ2_MAIZE)
Solyc06g068470.2.1	21.79	4.71	-2.18442	0.961628	N-methyltransferase (AHRD V1 **** D7KWM7_ARALY)
Solyc01g108640.1.1	18.4	4.01	-2.18442	0.952637	GDSL esterase/lipase At1g28600 (AHRD V1 ***- GDL9_ARATH)
Solyc04g081040.1.1	18.21	3.95	-2.18442	0.952312	Unknown Protein (AHRD V1)
Solyc03g083600.1.1	17.88	3.85	-2.18442	0.951333	Unknown Protein (AHRD V1)
Solyc10g005810.2.1	17.63	3.8	-2.18442	0.950429	Farnesyl pyrophosphate synthase (AHRD V1 ***- Q4TTY7_9APIA)
Solyc06g008660.2.1	777.69	162.57	-2.25154	0.985194	Unknown Protein (AHRD V1)
Solyc06g076870.2.1	168.77	35.75	-2.25154	0.984872	60S acidic ribosomal protein P0 (AHRD V1 ***- D7LEE5_ARALY)
Solyc00g030510.2.1	1103.03	235.75	-2.25154	0.984732	Polygalacturonase (AHRD V1 ***- Q9MBC0_SALGI)
Solyc01g094400.2.1	88.18	18.7	-2.25154	0.984141	Actin depolymerizing factor 10 (AHRD V1 **** B9I489_POPTR)
Solyc12g017520.1.1	67.76	14.4	-2.25154	0.983305	Salt tolerance protein II (AHRD V1 **-- B8XXR0_SESPO)
Solyc06g075550.2.1	82.7	17.72	-2.25154	0.983275	Serine/threonine kinase (AHRD V1 **** Q32SF8_HORVD)
Solyc08g016580.1.1	43.09	9.16	-2.25154	0.979358	Susceptibility homeodomain transcription factor (Fragment) (AHRD V1 ***- Q8SAA7_ORYSA)
Solyc08g077380.2.1	28.31	6.01	-2.25154	0.971652	Purine permease family protein (AHRD V1 **-* D7MCV2_ARALY)
Solyc01g090090.1.1	24.91	5.33	-2.25154	0.967368	Unknown Protein (AHRD V1)
Solyc12g088910.1.1	24.6	5.21	-2.25154	0.967357	Unknown Protein (AHRD V1)
Solyc10g054840.1.1	21.66	4.53	-2.25154	0.962636	Aquaporin (AHRD V1 ***- C8CE50_FRAAN)
Solyc12g014580.1.1	1087.22	218.65	-2.32193	0.985672	Pollen allergen Ole e 6 (AHRD V1 *-*- ALL6_OLEEU)
Solyc02g090060.1.1	138.1	27.51	-2.32193	0.985454	Unknown Protein (AHRD V1)
Solyc01g005050.2.1	43.71	8.65	-2.32193	0.980728	Unknown Protein (AHRD V1)
Solyc05g052700.2.1	34.29	6.71	-2.32193	0.977229	TPR domain protein (AHRD V1 *--- Q7MVN6_PORGI)
Solyc05g050750.1.1	30.23	5.99	-2.32193	0.974397	Calmodulin-like protein (AHRD V1 ***- Q6RZU7_MUSAC)
Solyc06g071300.1.1	27.73	5.42	-2.32193	0.972425	Genomic DNA chromosome 5 P1 clone MSN9 (AHRD V1 ---- Q9FL19_ARATH)
Solyc10g078800.1.1	25.8	5.24	-2.32193	0.969673	Protein phosphatase 2C (AHRD V1 *-*- B6T5D8_MAIZE)
Solyc01g110210.1.1	23.55	4.76	-2.32193	0.966723	Terminal ear1-like 2 protein (AHRD V1 *--- A9XIW7_POPCN)
Solyc05g055900.1.1	20.87	4.1	-2.32193	0.962154	Transcriptional activator TenA family (AHRD V1 *-*- Q3MH89_ANAVT)
Solyc12g099190.1.1	19.72	3.85	-2.32193	0.959608	Invertase inhibitor (AHRD V1 ***- C1KBP2_SOLTU)
Solyc08g081740.2.1	18.79	3.71	-2.32193	0.956923	Katanin p60 ATPase-containing subunit (AHRD V1 *--* KTNA1_ARATH)
Solyc09g011270.2.1	17.31	3.4	-2.32193	0.952119	CHP-rich zinc finger protein-like (AHRD V1 **-- Q8H5Y9_ORYSJ)
Solyc12g006820.1.1	17.13	3.35	-2.32193	0.951545	Fatty acid elongase 3-ketoacyl-CoA synthase (AHRD V1 **** Q6DUV5_BRANA)
Solyc12g009900.1.1	16.98	3.34	-2.32193	0.950862	Unknown Protein (AHRD V1)
Solyc09g011800.2.1	417.33	78.49	-2.39593	0.987067	PAR-1c protein (AHRD V1 ***- Q43589_TOBAC)
Solyc07g005040.2.1	633.27	120.99	-2.39593	0.986678	H-ATPase (AHRD V1 ***- Q8L6I3_ORYSJ)
Solyc05g054440.2.1	591.19	113.87	-2.39593	0.986402	Glucan endo-1 3-beta-glucosidase (AHRD V1 ***- B6TY63_MAIZE)
Solyc01g097660.2.1	78.41	14.69	-2.39593	0.986135	Pectinesterase inhibitor (AHRD V1 -**- PMEI_ACTDE)
Solyc11g007540.1.1	45.79	8.59	-2.39593	0.98287	Cytochrome P450
Solyc03g005980.2.1	49.26	9.58	-2.39593	0.982099	Transmembrane water channel aquaporin Z (AHRD V1 **** Q3KGD7_PSEPF)
Solyc01g104750.2.1	44.61	8.6	-2.39593	0.981698	MtN21 nodulin protein-like (AHRD V1 ***- B6TBZ6_MAIZE)
Solyc10g017830.1.1	38.74	7.26	-2.39593	0.98083	Serine/threonine-protein kinase 24 (AHRD V1 *-*- C5FYA6_NANOT)
Solyc02g081350.2.1	32.96	6.2	-2.39593	0.977885	Acyl-CoA synthetase/AMP-acid ligase II (AHRD V1 **** D0C359_9GAMM)
Solyc08g082590.2.1	33.96	6.52	-2.39593	0.977747	Glutaredoxin family protein (AHRD V1 **-- D7KS91_ARALY)
Solyc09g083090.2.1	20.5	3.84	-2.39593	0.963264	CBL-interacting protein kinase 20 (AHRD V1 ***- C4P7W9_VITVI)
Solyc07g062560.2.1	918.58	161.38	-2.47393	0.990109	Pollen allergen Phl p 11 (AHRD V1 ***- B6TNI5_MAIZE)
Solyc05g010310.2.1	349.32	61.67	-2.47393	0.990077	Chalcone--flavonone isomerase (AHRD V1 ***- D7LV11_ARALY)
Solyc03g053130.2.1	148.22	26.09	-2.47393	0.989941	Strictosidine synthase family protein (AHRD V1 ***- Q58L86_BRANA)
Solyc04g010250.2.1	316.43	56.9	-2.47393	0.988574	Lipase-like protein (AHRD V1 **-- Q9M3D1_ARATH)
Solyc06g007130.2.1	438.71	80.27	-2.47393	0.988103	Omega-3 fatty acid desaturase (AHRD V1 **** A9LNM9_SOLLC)
Solyc12g009840.1.1	71.42	12.92	-2.47393	0.987222	Pyrophosphate-energized proton pump (AHRD V1 ***- B0SRX3_LEPBP)
Solyc03g120860.2.1	39.41	7.08	-2.47393	0.98257	Early nodulin-like protein 1 (AHRD V1 *--- B6TP28_MAIZE)
Solyc10g007230.1.1	36.45	6.71	-2.47393	0.980484	Tetratricopeptide repeat protein 2-like (AHRD V1 **-- Q5ZDK5_ORYSJ)
Solyc06g076270.2.1	24.19	4.31	-2.47393	0.972312	Telomere repeat-binding protein 5 (AHRD V1 *-*- TRP5_ARATH)
Solyc07g006720.2.1	22.2	4.03	-2.47393	0.967931	UDP flavonoid 3-O-glucosyltransferase (Fragment) (AHRD V1 **** B5AIT4_IPOTF)
Solyc04g080040.2.1	19.42	3.41	-2.47393	0.964228	UBA/TS-N domain protein (AHRD V1 *--- B6QFU5_PENMQ)
Solyc11g005490.1.1	18.96	3.49	-2.47393	0.960454	Fasciclin-like arabinogalactan protein 18 (AHRD V1 *-*- A9XTM3_GOSHI)
Solyc07g054810.1.1	141.84	23.58	-2.55639	0.991317	Unknown Protein (AHRD V1)
Solyc04g008780.2.1	199.81	34.24	-2.55639	0.990693	Dihydroflavonol 4-reductase family (AHRD V1 **** D7MD06_ARALY)
Solyc03g031510.2.1	589.55	102.9	-2.55639	0.990555	HR7 protein (AHRD V1 ***- Q9SXP0_HYONI)
Solyc02g094040.2.1	65.13	10.93	-2.55639	0.989827	Lipase (AHRD V1 **** Q1XBG1_RICCO)
Solyc06g008330.1.1	37.9	6.47	-2.55639	0.984326	Serine/threonine-protein kinase 38 (AHRD V1 ***- B6U4A0_MAIZE)
Solyc03g080070.2.1	35.9	5.98	-2.55639	0.984275	Nodulin-like protein (AHRD V1 ***- Q8H8G2_ORYSJ)
Solyc11g006300.1.1	37.44	6.51	-2.55639	0.983908	3-oxo-5-alpha-steroid 4-dehydrogenase family protein (AHRD V1 ***- D7M7I5_ARALY)
Solyc11g072670.1.1	34.01	5.62	-2.55639	0.983568	Unknown Protein (AHRD V1)
Solyc06g074850.2.1	34.8	6.07	-2.55639	0.982638	Serine carboxypeptidase (AHRD V1 **** Q2Z1Y2_PRUMU)
Solyc02g072410.1.1	28.73	4.89	-2.55639	0.979008	Unknown Protein (AHRD V1)
Solyc06g075460.2.1	28.89	5.01	-2.55639	0.978862	TGF-beta receptor type I/II extracellular region (AHRD V1 *--- Q2HSV0_MEDTR)
Solyc10g079810.1.1	23.02	3.99	-2.55639	0.972183	Unknown Protein (AHRD V1)
Solyc09g007650.1.1	21.13	3.52	-2.55639	0.970024	Fasciclin-like arabinogalactan protein 7 (AHRD V1 ***- A9XTL2_GOSHI)
Solyc05g007880.2.1	20.59	3.5	-2.55639	0.967962	Dof zinc finger protein (AHRD V1 ***- C4B6D7_IPOBA)
Solyc04g072040.1.1	18.75	3.18	-2.55639	0.9634	Unknown Protein (AHRD V1)
Solyc12g027540.1.1	17.31	2.98	-2.55639	0.958664	Unknown Protein (AHRD V1)
Solyc03g063040.2.1	16.76	2.81	-2.55639	0.957832	Amino acid transporter (AHRD V1 ***- B9HLH9_POPTR)
Solyc02g078280.2.1	15.54	2.59	-2.55639	0.952919	Myosin-like protein (AHRD V1 *-*- Q84ZN0_ORYSJ)
Solyc11g008860.1.1	1129.29	179.91	-2.64386	0.992805	Laccase-2 (AHRD V1 **-- LAC2_ORYSJ)
Solyc06g007140.2.1	71.83	11.32	-2.64386	0.992128	Omega-3 fatty acid desaturase (AHRD V1 **** A9LNM9_SOLLC)
Solyc12g009800.1.1	177.06	29.19	-2.64386	0.991591	Purple acid phosphatase 3 (AHRD V1 ***- Q6J5M8_SOLTU)
Solyc02g087860.2.1	66.63	10.6	-2.64386	0.991279	Transcription factor style2.1 (AHRD V1 **-* B6CG45_SOLPN)
Solyc10g017520.2.1	96.61	15.83	-2.64386	0.991169	Cysteine and glycine-rich protein 3 (AHRD V1 **-- D2SQP3_PIG)
Solyc04g079910.2.1	51.91	8.27	-2.64386	0.989846	Coiled-coil domain-containing protein 109A (AHRD V1 *--- C109A_MOUSE)
Solyc12g036800.1.1	46.61	7.54	-2.64386	0.988239	Ve resistance gene-like protein (Fragment) (AHRD V1 **-- Q84X60_SOLTU)
Solyc09g015450.2.1	37.88	6.23	-2.64386	0.985405	Unknown Protein (AHRD V1)
Solyc03g115890.2.1	33.19	5.43	-2.64386	0.983229	Expansin (AHRD V1 ***- Q9FVG9_SOLLC)
Solyc06g063400.2.1	28.93	4.59	-2.64386	0.982065	Wound-induced basic protein (AHRD V1 ***- PR4_PHAVU)
Solyc12g088400.1.1	27.5	4.33	-2.64386	0.980912	Zinc-finger protein (AHRD V1 ***- Q40899_PETHY)
Solyc02g089210.2.1	19.84	3.12	-2.64386	0.969518	MADS box transcription factor (AHRD V1 ***- Q689E7_GENTR)
Solyc08g069110.2.1	20.63	3.35	-2.64386	0.969429	Dtdp-glucose 4 6-dehydratase (AHRD V1 *-*- B8C5W5_THAPS)
Solyc12g056040.1.1	16.83	2.61	-2.64386	0.961288	Unknown Protein (AHRD V1)
Solyc06g083290.1.1	17.24	2.81	-2.64386	0.960194	Ninja-family protein 2 (AHRD V1 ***- NNJA2_WHEAT)
Solyc10g006940.1.1	153.94	22.41	-2.73697	0.994811	Unknown Protein (AHRD V1)
Solyc05g054110.2.1	132.91	19.88	-2.73697	0.994319	RHO protein GDP dissociation inhibitor (AHRD V1 **** Q705X3_MEDTR)
Solyc08g008340.2.1	102.59	15.32	-2.73697	0.994102	Nucleoside diphosphate kinase (AHRD V1 ***- D5ILC3_SOLTU)
Solyc06g075470.1.1	147.46	22.61	-2.73697	0.994094	Nucleoside diphosphate kinase (AHRD V1 ***- B9RCT5_RICCO)
Solyc09g064900.1.1	135.17	20.71	-2.73697	0.994062	AAA ATPase containing von Willebrand factor type A (AHRD V1 *--- B6THL9_MAIZE)
Solyc02g080960.1.1	96.85	14.87	-2.73697	0.993323	TO62-3 (Fragment) (AHRD V1 ***- Q3LVL2_TAROF)
Solyc03g046580.1.1	69.39	10.54	-2.73697	0.992992	Pollen Ole e 1 allergen and extensin (AHRD V1 *-*- Q2HSE9_MEDTR)
Solyc05g052110.2.1	60.99	9.35	-2.73697	0.992408	Pectinesterase (AHRD V1 **** D8VPP5_OLEEU)
Solyc10g009390.2.1	54.92	8.26	-2.73697	0.991852	Cytochrome P450
Solyc12g027650.1.1	32.14	4.95	-2.73697	0.984993	Nuclear transcription factor Y subunit B-3 (AHRD V1 *-*- B6SUG8_MAIZE)
Solyc11g018590.1.1	28.71	4.39	-2.73697	0.982933	Subtilase family protein (AHRD V1 **-- D7LYP9_ARALY)
Solyc05g052120.2.1	28.48	4.36	-2.73697	0.982723	Pectinesterase (AHRD V1 **** D8VPP5_OLEEU)
Solyc01g095520.2.1	25.46	3.85	-2.73697	0.979963	Arabinogalactan peptide 16 (AHRD V1 **-- AGP16_ARATH)
Solyc11g006570.1.1	24.24	3.72	-2.73697	0.978327	Inositol oxygenase (AHRD V1 ***- B9XK04_9BACT)
Solyc01g110230.1.1	20.67	3.17	-2.73697	0.972506	MEI2-like RNA binding protein (AHRD V1 *--- Q75M35_ORYSJ)
Solyc07g062220.2.1	19.49	2.88	-2.73697	0.970313	Os06g0207500 protein (Fragment) (AHRD V1 **-- Q0DDQ9_ORYSJ)
Solyc09g018810.1.1	18.17	2.81	-2.73697	0.965617	Unknown Protein (AHRD V1)
Solyc08g078620.1.1	15.3	2.33	-2.73697	0.955715	3&apos-5&apos exonuclease (AHRD V1 ***- B0WTA6_CULQU)
Solyc07g049420.1.1	15.08	2.29	-2.73697	0.954783	60s acidic ribosomal protein P1 (AHRD V1 ***- Q9FLV1_ARATH)
Solyc02g032910.1.1	1392.94	194.42	-2.8365	0.995226	Glycine rich protein (AHRD V1 *-*- Q43498_SOLLC)
Solyc12g014180.1.1	131.76	19.02	-2.8365	0.994767	Malate dehydrogenase (AHRD V1 ***- Q8L5C9_SOLTU)
Solyc01g111070.2.1	99.78	14.06	-2.8365	0.994739	Chalcone synthase family protein (AHRD V1 ***- Q460V0_ARATH)
Solyc03g044430.2.1	52.98	7.32	-2.8365	0.992856	Nicotinate phosphoribosyltransferase-like protein (AHRD V1 **** Q6XQM5_MEDTR)
Solyc02g067150.2.1	42.57	5.88	-2.8365	0.990984	Pro-resilin (AHRD V1 **-- B6T4Q5_MAIZE)
Solyc08g008650.1.1	34.54	4.81	-2.8365	0.987895	G protein-coupled seven transmembrane receptor (AHRD V1 **-- A8J5P4_CHLRE)
Solyc11g072680.1.1	32.05	4.63	-2.8365	0.986273	Fasciclin-like arabinogalactan protein 21 (AHRD V1 *-*- FLA21_ARATH)
Solyc03g121780.1.1	27.4	3.73	-2.8365	0.983774	Kinase like protein (AHRD V1 **** O23334_ARATH)
Solyc10g007220.1.1	16.07	2.17	-2.8365	0.96177	Tetratricopeptide repeat domain protein (AHRD V1 **-- B4W421_9CYAN)
Solyc10g048180.1.1	15.1	2.11	-2.8365	0.95667	Amino acid transporter family protein (AHRD V1 **** D7LI10_ARALY)
Solyc10g054910.1.1	639.34	82.71	-2.94342	0.996472	Peptidyl-prolyl cis-trans isomerase (AHRD V1 ***- Q9XF12_SOLTU)
Solyc02g066990.2.1	74.22	9.73	-2.94342	0.995349	Unknown Protein (AHRD V1)
Solyc01g009240.2.1	57	7.13	-2.94342	0.994803	Beta-D-glucosidase (AHRD V1 ***- O82074_TROMA)
Solyc08g079080.2.1	57.31	7.72	-2.94342	0.993688	Acid beta-fructofuranosidase (AHRD V1 **-- Q575T1_WHEAT)
Solyc09g092210.2.1	50.39	6.79	-2.94342	0.992786	Nuclear movement protein nudc (AHRD V1 *-*- Q17KI6_AEDAE)
Solyc09g091960.2.1	39.11	4.92	-2.94342	0.991459	High mobility group family protein (AHRD V1 **-- D7KE87_ARALY)
Solyc02g091830.2.1	27.23	3.46	-2.94342	0.984751	Hexokinase (AHRD V1 ***- Q9FVD3_CITSI)
Solyc02g085380.2.1	21.93	2.89	-2.94342	0.977807	Integral membrane protein (AHRD V1 **-- A8JE84_CHLRE)
Solyc12g089310.1.1	21.55	2.79	-2.94342	0.977386	Tubulin beta-1 chain (AHRD V1 ***- D7KT68_ARALY)
Solyc04g014220.1.1	18.77	2.41	-2.94342	0.971538	RING finger protein (AHRD V1 *-*- C6EUD3_SOYBN)
Solyc02g062960.2.1	18.09	2.44	-2.94342	0.968548	Homeobox-leucine zipper protein (AHRD V1 *-*- Q9FXN8_ZINEL)
Solyc10g024370.1.1	15	1.96	-2.94342	0.958116	Phospholipase D (AHRD V1 **** Q6AVR2_ORYSJ)
Solyc03g093230.2.1	14.6	1.9	-2.94342	0.956309	Aquaporin (AHRD V1 ***- Q39956_HELAN)
Solyc12g096940.1.1	14	1.86	-2.94342	0.952509	CCT motif family protein (AHRD V1 *-*- B6TX69_MAIZE)
Solyc12g056420.1.1	13.56	1.76	-2.94342	0.950369	Lysophospholipid acyltransferase (AHRD V1 **** B6K7S6_SCHJY)
Solyc05g054480.2.1	177.08	20.43	-3.05889	0.99779	Actin (AHRD V1 ***- B5M4V6_TOBAC)
Solyc07g015960.1.1	111.51	13.01	-3.05889	0.99734	Hydroxycinnamoyl CoA shikimate/quinate hydroxycinnamoyltransferase-like protein (AHRD V1 **-* B9N329_POPTR)
Solyc03g031610.1.1	87.3	10.28	-3.05889	0.99686	Unknown Protein (AHRD V1)
Solyc02g080760.1.1	891.3	111.28	-3.05889	0.996845	Glycine-rich protein (AHRD V1 *-*- Q41349_SOLLC)
Solyc08g007060.2.1	105.88	12.71	-3.05889	0.996756	Peptide transporter-like protein (AHRD V1 **-* Q9SVS9_ARATH)
Solyc08g007070.2.1	101.61	12.34	-3.05889	0.996569	Unknown Protein (AHRD V1)
Solyc03g118140.2.1	35.98	4.15	-3.05889	0.991602	Protein kish-A (AHRD V1 **-- KISHA_CHICK)
Solyc09g091520.1.1	30.34	3.72	-3.05889	0.987557	60S acidic ribosomal protein P0 (AHRD V1 ***- D7LEE5_ARALY)
Solyc01g103120.2.1	19.55	2.4	-3.05889	0.974153	Dynamin-2A (AHRD V1 ***- B6UEQ3_MAIZE)
Solyc11g012490.1.1	17.62	2.15	-3.05889	0.969011	Unknown Protein (AHRD V1)
Solyc02g071770.2.1	16.96	1.99	-3.05889	0.967911	DUF1264 domain protein (AHRD V1 **-- A1CBM4_ASPCL)
Solyc06g068160.2.1	15.92	1.99	-3.05889	0.962922	5&apos-AMP-activated protein kinase subunit gamma-3 (AHRD V1 **-- B1PM77_SHEEP)
Solyc11g027900.1.1	13.8	1.71	-3.05889	0.952717	Unknown Protein (AHRD V1)
Solyc07g006740.2.1	13.52	1.57	-3.05889	0.952548	Multidrug resistance protein mdtK (AHRD V1 ***- MDTK_ENT38)
Solyc03g119820.1.1	95.07	10.12	-3.18442	0.99793	Oleosin Bn-V (AHRD V1 ***- B6UIA7_MAIZE)
Solyc10g085640.1.1	112.73	12.45	-3.18442	0.997805	Beta-fructofuranosidase insoluble isoenzyme 2 (AHRD V1 **-* B6U1H5_MAIZE)
Solyc03g005150.2.1	88.3	10.03	-3.18442	0.997257	Solute carrier family 2, facilitated glucose transporter member 2 (AHRD V1 ***- GTR2_RAT)
Solyc03g114200.2.1	50.77	5.34	-3.18442	0.995864	Nodulin MtN3 family protein (AHRD V1 **-- D7LPN4_ARALY)
Solyc07g065130.2.1	50.26	5.54	-3.18442	0.9953	Calcium-binding protein 39 (AHRD V1 **-* B6U5L1_MAIZE)
Solyc03g113810.1.1	48.62	5.25	-3.18442	0.995274	Unknown Protein (AHRD V1)
Solyc00g009040.2.1	46.42	5.21	-3.18442	0.994586	Polyadenylate-binding protein 2 (AHRD V1 **** B6U4M0_MAIZE)
Solyc11g069900.1.1	45.44	5.01	-3.18442	0.994529	Unknown Protein (AHRD V1)
Solyc10g053910.1.1	38.27	4.39	-3.18442	0.992453	B-cell receptor-associated protein 31-like containing protein (AHRD V1 ***- B6TG43_MAIZE)
Solyc07g065770.2.1	33.99	3.57	-3.18442	0.991578	ABC transporter G family member 26 (AHRD V1 ***- AB26G_ARATH)
Solyc07g056130.1.1	28.43	3.23	-3.18442	0.987394	Unknown Protein (AHRD V1)
Solyc07g008210.2.1	26.4	2.85	-3.18442	0.986135	TPR domain protein (AHRD V1 *-*- B6U810_MAIZE)
Solyc06g008640.2.1	22.94	2.58	-3.18442	0.981692	Pollen allergen Ole e 6 (AHRD V1 --*- ALL6_OLEEU)
Solyc01g099570.2.1	21.64	2.33	-3.18442	0.980229	Desiccation-related protein PCC13-62 (AHRD V1 *-*- B6TNA6_MAIZE)
Solyc03g082350.2.1	22.01	2.51	-3.18442	0.980178	Avr9/Cf-9 rapidly elicited protein 65 (AHRD V1 *-*- Q9FQZ0_TOBAC)
Solyc01g110240.1.1	19.67	2.09	-3.18442	0.976834	MEI2-like RNA binding protein (AHRD V1 **-- Q75M35_ORYSJ)
Solyc09g008510.1.1	14.78	1.56	-3.18442	0.961073	UDP-glucosyltransferase family 1 protein (AHRD V1 **** C6KI43_CITSI)
Solyc01g109730.1.1	13.87	1.48	-3.18442	0.956263	Unknown Protein (AHRD V1)
Solyc06g059790.2.1	693.47	68.35	-3.32193	0.998779	Non-specific lipid-transfer protein (AHRD V1 **** A9NJW5_PICSI)
Solyc02g068400.2.1	185.22	17.89	-3.32193	0.998771	AT4G20050-like protein (Fragment) (AHRD V1 *-*- D6PQZ2_9BRAS)
Solyc01g090710.2.1	155.73	15.81	-3.32193	0.998558	Malate dehydrogenase, cytoplasmic (AHRD V1 **** MDHC_ORYSJ)
Solyc03g119880.2.1	88.32	8.72	-3.32193	0.998176	Early nodulin-55-1 (Fragment) (AHRD V1 *--- NO551_SOYBN)
Solyc06g071830.2.1	52.67	5.29	-3.32193	0.996366	BTB/POZ domain-containing protein (AHRD V1 **-- D2KTV8_LOTJA)
Solyc04g077240.2.1	39.83	4.14	-3.32193	0.993771	Branched-chain-amino-acid aminotransferase (AHRD V1 **** Q94CF8_CAPAN)
Solyc07g054180.2.1	38.01	3.67	-3.32193	0.993604	Unknown Protein (AHRD V1)
Solyc08g008640.2.1	37.16	3.86	-3.32193	0.992952	Unknown Protein (AHRD V1)
Solyc08g008310.2.1	36.57	3.68	-3.32193	0.992918	Long-chain-fatty-acid-CoA ligase (AHRD V1 **** B2WS80_ARAHA)
Solyc02g088080.1.1	31.36	3.15	-3.32193	0.99051	Unknown Protein (AHRD V1)
Solyc04g070960.1.1	25.55	2.65	-3.32193	0.98573	Dof zinc finger protein 9 (AHRD V1 *-*- A5HWF8_HORVD)
Solyc01g008050.2.1	22.85	2.22	-3.32193	0.982987	Leaf senescence protein-like (AHRD V1 ***- Q67V91_ORYSJ)
Solyc01g105730.1.1	21.94	2.23	-3.32193	0.981288	Periaxin-like protein (AHRD V1 *--- Q9LXB8_ARATH)
Solyc07g042220.1.1	21.66	2.17	-3.32193	0.981017	Beta-galactosidase (AHRD V1 **** B9RR68_RICCO)
Solyc11g008240.1.1	20.01	2.03	-3.32193	0.977841	SKP1-like protein (AHRD V1 ***- C3V9V9_CITMA)
Solyc01g103130.1.1	18.03	1.81	-3.32193	0.973283	Dynamin-2A (AHRD V1 ***- B6UEQ3_MAIZE)
Solyc01g008680.2.1	17.74	1.82	-3.32193	0.972253	S2 self-incompatibility locus-linked pollen 3.2 protein (AHRD V1 ***- Q7XAE8_PETIN)
Solyc12g010560.1.1	17.3	1.68	-3.32193	0.971406	GDSL esterase/lipase At2g24560 (AHRD V1 ***- GDL39_ARATH)
Solyc03g115880.1.1	16.94	1.75	-3.32193	0.969797	Unknown Protein (AHRD V1)
Solyc05g031600.1.1	16.73	1.65	-3.32193	0.969518	Alliinase (Fragment) (AHRD V1 ***- Q94EJ8_ALLFI)
Solyc04g015260.1.1	15.66	1.51	-3.32193	0.965884	Unknown Protein (AHRD V1)
Solyc12g056320.1.1	15.38	1.5	-3.32193	0.964593	Unknown Protein (AHRD V1)
Solyc11g006220.1.1	13.66	1.33	-3.32193	0.956197	Myosin XI (AHRD V1 ***- Q5R216_TOBAC)
Solyc03g031520.2.1	1228.5	108.91	-3.47393	0.999378	Fruit-specific protein (AHRD V1 ***- FSPM_SOLLC)
Solyc02g091420.2.1	226.1	20.44	-3.47393	0.999214	Aquaporin (AHRD V1 ***- B3GK86_ARATH)
Solyc12g062910.1.1	923.3	83.79	-3.47393	0.999202	Cysteine-rich protein (AHRD V1 ***- Q9SDN7_TOBAC)
Solyc08g080190.2.1	152.63	13.66	-3.47393	0.999138	Choline dehydrogenase (AHRD V1 ***- A8NUQ9_COPC7)
Solyc12g098490.1.1	104.94	9.85	-3.47393	0.998673	Serine hydroxymethyltransferase (AHRD V1 **** D2D306_GOSHI)
Solyc01g010900.2.1	77.31	6.69	-3.47393	0.998607	Cytochrome P450
Solyc07g043550.2.1	60.42	5.68	-3.47393	0.997419	UDP-glucose 4-epimerase (AHRD V1 **** A6LK35_THEM4)
Solyc01g068380.2.1	49.89	4.33	-3.47393	0.996782	Purple acid phosphatase (AHRD V1 *-** B6TKL3_MAIZE)
Solyc09g064560.1.1	47.49	4.49	-3.47393	0.995951	Unknown Protein (AHRD V1)
Solyc01g095780.2.1	44.83	4.11	-3.47393	0.995697	Non-specific lipid-transfer protein (AHRD V1 ***- Q9M5C1_TOBAC)
Solyc06g035610.2.1	43.25	4.08	-3.47393	0.995183	RNA binding protein (AHRD V1 **-* B6TNV4_MAIZE)
Solyc03g083700.1.1	39.72	3.38	-3.47393	0.994816	Invertase/pectin methylesterase inhibitor family protein (AHRD V1 **-- D7MG24_ARALY)
Solyc08g077700.2.1	27.9	2.45	-3.47393	0.989101	Eukaryotic translation initiation factor 4 gamma 1 (AHRD V1 *-*- A9QXE6_MESAU)
Solyc10g085650.1.1	27.18	2.52	-3.47393	0.98805	Beta-fructofuranosidase insoluble isoenzyme 2 (AHRD V1 **-- B6U1H5_MAIZE)
Solyc02g086920.1.1	25.14	2.21	-3.47393	0.986534	Nodulin MtN3 family protein (AHRD V1 **-- D7LYT4_ARALY)
Solyc03g113530.2.1	20.53	1.77	-3.47393	0.980261	MYB transcription factor (AHRD V1 *-** Q9LSI7_ARATH)
Solyc04g054300.1.1	18.82	1.75	-3.47393	0.97604	Unknown Protein (AHRD V1)
Solyc02g080180.1.1	18.27	1.7	-3.47393	0.974592	Oligosaccharide transporter (AHRD V1 **-* B4FSV8_MAIZE)
Solyc00g058900.1.1	17.35	1.54	-3.47393	0.972586	GDSL esterase/lipase At2g31540 (AHRD V1 ***- GDL43_ARATH)
Solyc03g007850.1.1	17.07	1.58	-3.47393	0.97117	Pre-mRNA-splicing factor CLF1 (AHRD V1 ***- C5JTS1_AJEDS)
Solyc12g044900.1.1	16.7	1.44	-3.47393	0.970792	Protein SEY1 (AHRD V1 ***- B6U4D9_MAIZE)
Solyc08g080300.1.1	15.31	1.4	-3.47393	0.965086	Solute carrier family 2, facilitated glucose transporter member 3 (AHRD V1 ***- GTR3_CHICK)
Solyc02g094370.1.1	14.75	1.26	-3.47393	0.963126	Exocyst complex protein EXO70 (AHRD V1 *--- EXO70_KLULA)
Solyc01g073980.1.1	13.8	1.23	-3.47393	0.958101	Unknown Protein (AHRD V1)
Solyc04g076750.1.1	12.72	1.14	-3.47393	0.951386	Oligopeptide transporter 4 (AHRD V1 **** B6U8Q5_MAIZE)
Solyc06g064700.1.1	12.59	1.1	-3.47393	0.950894	Coiled-coil-containing protein (Fragment) (AHRD V1 *-*- A7TZ74_9MAXI)
Solyc01g099540.2.1	423.85	32.1	-3.64386	0.999707	NTM19 protein (AHRD V1 ***- O24140_TOBAC)
Solyc01g090600.2.1	234.81	18.64	-3.64386	0.99958	Chalcone synthase 3 protein (AHRD V1 ***- D5LQ17_BRARA)
Solyc12g044630.1.1	417.86	33.26	-3.64386	0.999565	Profilin (AHRD V1 ***- Q9SMC0_TOBAC)
Solyc09g011790.2.1	359.78	29.05	-3.64386	0.99952	PAR-1c protein (AHRD V1 ***- Q43589_TOBAC)
Solyc06g067980.2.1	520.69	43.95	-3.64386	0.999476	Unknown Protein (AHRD V1)
Solyc06g069220.1.1	156.96	12.96	-3.64386	0.999406	Aspartic proteinase nepenthesin I (AHRD V1 **-- A9ZMF9_NEPAL)
Solyc12g088160.1.1	131.43	10.5	-3.64386	0.999404	Phosphoenolpyruvate carboxykinase (AHRD V1 ***- Q8W505_SOLLC)
Solyc12g006400.1.1	69.36	5.52	-3.64386	0.998491	Unknown Protein (AHRD V1)
Solyc03g111860.1.1	61.39	5.2	-3.64386	0.997939	Glyoxal oxidase (AHRD V1 ***- B6SXT7_MAIZE)
Solyc09g014220.2.1	53.86	4.34	-3.64386	0.997463	Peptide transporter (AHRD V1 **-* O48542_HORVU)
Solyc06g060910.1.1	45.77	3.84	-3.64386	0.996242	Glycerol-3-phosphate transporter (AHRD V1 **** B0SG38_LEPBA)
Solyc06g063390.2.1	43.37	3.59	-3.64386	0.995786	Wound-induced basic protein (AHRD V1 ***- PR4_PHAVU)
Solyc12g089130.1.1	41.35	3.31	-3.64386	0.995402	CRAL/TRIO domain containing protein expressed (AHRD V1 **-- Q75GU9_ORYSJ)
Solyc12g006950.1.1	37.91	2.87	-3.64386	0.994673	Sulfate transporter (AHRD V1 ***- Q0WVG5_ARATH)
Solyc06g062750.2.1	34.06	2.61	-3.64386	0.993247	5&apos-nucleotidase surE (AHRD V1 *-*- C7LSK7_DESBD)
Solyc01g079890.2.1	29.13	2.34	-3.64386	0.990277	Aquaporin (AHRD V1 ***- B3GK86_ARATH)
Solyc04g009760.1.1	26.46	2.06	-3.64386	0.988337	AT5G22070 protein (Fragment) (AHRD V1 ***- B9DHZ2_ARATH)
Solyc07g056300.1.1	25.38	2.05	-3.64386	0.987141	AT-hook DNA-binding protein (Fragment) (AHRD V1 **-* A1DR81_CATRO)
Solyc06g034030.2.1	24.31	1.91	-3.64386	0.986177	Myb family transcription factor (AHRD V1 *-*- Q2A9N2_BRAOL)
Solyc01g006440.1.1	23.5	1.83	-3.64386	0.985262	Peptide transporter-like protein (AHRD V1 **-* Q9SVS9_ARATH)
Solyc10g086390.1.1	22.22	1.79	-3.64386	0.983362	Short-chain dehydrogenase/reductase family protein (AHRD V1 ***- D7LJU7_ARALY)
Solyc02g062410.1.1	21.95	1.71	-3.64386	0.983148	Nuclear movement protein nudc (AHRD V1 ***- Q17KI6_AEDAE)
Solyc01g105740.1.1	21.23	1.78	-3.64386	0.98167	Unknown Protein (AHRD V1)
Solyc07g052200.1.1	18.44	1.48	-3.64386	0.976151	Pre-mRNA-splicing factor syf2 (AHRD V1 *-*- D0MQW6_PHYIN)
Solyc09g064570.1.1	16.01	1.31	-3.64386	0.968822	Unknown Protein (AHRD V1)
Solyc02g005340.2.1	15.59	1.19	-3.64386	0.967725	Oligopeptide transporter (Fragment) (AHRD V1 **** B0DAK3_LACBS)
Solyc01g081630.2.1	15.69	1.26	-3.64386	0.967703	Auxin-regulated protein (AHRD V1 *-*- Q945F5_SOLLC)
Solyc12g094470.1.1	15.6	1.31	-3.64386	0.967103	Laccase-2 (AHRD V1 **-- LAC2_ORYSJ)
Solyc11g071310.1.1	15.47	1.22	-3.64386	0.967043	Os01g0786800 protein (Fragment) (AHRD V1 ***- Q0JIP0_ORYSJ)
Solyc03g117150.2.1	15.4	1.21	-3.64386	0.966822	H-ATPase (AHRD V1 **** Q8L6I3_ORYSJ)
Solyc07g049600.2.1	14.77	1.17	-3.64386	0.963992	Fimbrin-like potential actin filament bundling protein (AHRD V1 *--* Q5AC06_CANAL)
Solyc01g086790.1.1	14.11	1.16	-3.64386	0.960507	Unknown Protein (AHRD V1)
Solyc12g098500.1.1	319.91	22.2	-3.8365	0.999771	Adenosylhomocysteinase (AHRD V1 ***- A1KYB0_TOBAC)
Solyc05g054060.2.1	191.09	12.86	-3.8365	0.999762	UTP-glucose 1 phosphate uridylyltransferase (AHRD V1 **** B3VDY8_EUCGR)
Solyc03g051960.2.1	164.69	11.54	-3.8365	0.999692	Fatty acyl coA reductase (AHRD V1 **-* Q8L4M0_WHEAT)
Solyc11g010290.1.1	91.25	6.22	-3.8365	0.999327	2-oxoglutarate/malate translocator (AHRD V1 **-* Q9FMF7_ARATH)
Solyc10g085750.1.1	80.95	5.75	-3.8365	0.9991	Polyadenylate-binding protein 1 (AHRD V1 ***- Q6DF12_XENTR)
Solyc06g068700.2.1	77.42	5.11	-3.8365	0.999087	Calcium-binding protein Calnexin (AHRD V1 **-* Q9BLH3_HALRO)
Solyc01g097960.2.1	64.38	4.23	-3.8365	0.998586	Late embryogenesis abundant protein D-34 (AHRD V1 **-- B6UH67_MAIZE)
Solyc04g011590.2.1	59.15	3.85	-3.8365	0.9983	Histidine amino acid transporter (AHRD V1 **** Q85V22_ORYSI)
Solyc08g076790.2.1	61.59	4.48	-3.8365	0.998289	Cinnamoyl-CoA reductase-like protein (AHRD V1 ***- Q9M0B3_ARATH)
Solyc00g009070.1.1	42.36	3	-3.8365	0.995969	Unknown Protein (AHRD V1)
Solyc02g082410.2.1	39.91	2.69	-3.8365	0.995457	MFS family major facilitator transporter D-xylose cation symporter (AHRD V1 *-** D4E1S5_SEROD)
Solyc12g014500.1.1	35.35	2.51	-3.8365	0.993947	S-adenosyl-L-methionine salicylic acid carboxyl methyltransferase-like protein (AHRD V1 **** Q9FLN8_ARATH)
Solyc05g046040.1.1	33.29	2.31	-3.8365	0.993107	CONSTANS-like zinc finger protein (AHRD V1 **-- D0EP07_SOYBN)
Solyc08g059740.1.1	32.7	2.23	-3.8365	0.992871	H1-(Fragment) (AHRD V1 ***- Q43351_ARATH)
Solyc04g005740.1.1	30.73	2.28	-3.8365	0.991606	RING finger protein 38 (AHRD V1 *-*- RNF38_MOUSE)
Solyc08g042000.2.1	29.89	2.22	-3.8365	0.991115	Sucrose phosphate synthase protein 1 (AHRD V1 **** B2BMQ3_PRUPE)
Solyc12g088000.1.1	29.34	2.13	-3.8365	0.990841	Aminotransferase family protein (AHRD V1 ***- B9HZQ9_POPTR)
Solyc04g005760.1.1	26.36	1.84	-3.8365	0.988632	RING finger protein 38 (AHRD V1 *-*- RNF38_MOUSE)
Solyc12g008320.1.1	22.67	1.5	-3.8365	0.984834	Solute carrier family 2, facilitated glucose transporter member 3 (AHRD V1 ***- GTR3_CHICK)
Solyc12g042370.1.1	21.97	1.43	-3.8365	0.98388	Dehydrogenase/reductase SDR family member 7 (AHRD V1 *-*- DHRS7_HUMAN)
Solyc05g008680.1.1	21.63	1.51	-3.8365	0.983108	24-sterol C-methyltransferase (AHRD V1 **** B0FDL8_GOSHI)
Solyc04g005150.2.1	17.77	1.21	-3.8365	0.975204	Uridine kinase (AHRD V1 ***- C3SA58_BRADI)
Solyc10g006080.1.1	17.78	1.23	-3.8365	0.975195	Sodium/hydrogen exchanger (AHRD V1 **** D7MKH9_ARALY)
Solyc06g075700.2.1	16.2	1.06	-3.8365	0.970801	Unknown Protein (AHRD V1)
Solyc02g014560.2.1	15.77	1.1	-3.8365	0.968954	Calcium binding atopy-related autoantigen 1 (AHRD V1 **-* B6SL16_MAIZE)
Solyc05g009240.2.1	14.62	1.06	-3.8365	0.96389	Os05g0264200 protein (Fragment) (AHRD V1 *-*- Q0DJL6_ORYSJ)
Solyc12g011120.1.1	13.21	0.95	-3.8365	0.956552	Glucose-1-phosphate adenylyltransferase (AHRD V1 ***- Q9M4W7_PERFR)
Solyc05g008240.2.1	13.03	0.87	-3.8365	0.955906	Unknown Protein (AHRD V1)
Solyc11g073210.1.1	483.23	27.41	-4.05889	0.999953	Legumin 11S-globulin (AHRD V1 **-- Q39770_GINBI)
Solyc03g118580.2.1	272.19	16.45	-4.05889	0.999885	Lipid binding protein (AHRD V1 *-*- D7KRJ2_ARALY)
Solyc03g031490.2.1	346.22	21.68	-4.05889	0.999875	HR7 protein (AHRD V1 ***- Q9SXP0_HYONI)
Solyc05g053450.2.1	175.34	10.52	-4.05889	0.999841	Late embryogenesis abundant protein 1 (AHRD V1 *-*- LEA1_CICAR)
Solyc09g092130.2.1	89.05	5.49	-4.05889	0.999374	Sucrose phosphate synthase (AHRD V1 ***- D6R6Y5_9LILI)
Solyc07g065780.1.1	71.28	4.2	-4.05889	0.998966	ABC transporter G family member 26 (AHRD V1 ***- AB26G_ARATH)
Solyc10g017550.2.1	64.16	4.01	-4.05889	0.998609	Actin depolymerizing factor 3 (AHRD V1 **** B9GWH0_POPTR)
Solyc06g083610.2.1	62.85	3.87	-4.05889	0.99855	Unknown Protein (AHRD V1)
Solyc06g076370.2.1	61.6	3.59	-4.05889	0.998529	Eukaryotic RNA polymerase II heptapeptide repeat (AHRD V1 *--- Q2HS33_MEDTR)
Solyc06g062800.2.1	53.97	3.21	-4.05889	0.997992	ATP-dependent RNA helicase eIF4A (AHRD V1 ***- A8PG49_COPC7)
Solyc07g053780.2.1	53.54	3.19	-4.05889	0.997951	Non-specific lipid-transfer protein (Fragment) (AHRD V1 **** B3SJF4_ARALP)
Solyc06g075990.2.1	44.38	2.57	-4.05889	0.996676	Glyoxalase/bleomycin resistance protein/dioxygenase (AHRD V1 ***- A1WPN3_VEREI)
Solyc01g081250.2.1	40.66	2.55	-4.05889	0.995777	Glutathione-S-transferase (AHRD V1 ***- A3FMP5_SOLLC)
Solyc09g007820.1.1	37.25	2.38	-4.05889	0.994794	Phototropic-responsive NPH3 family protein (AHRD V1 **-- D7KEU3_ARALY)
Solyc02g078250.2.1	32.96	2.1	-4.05889	0.993128	UPF0497 membrane protein 9 (AHRD V1 ***- U4979_RICCO)
Solyc12g013630.1.1	31.07	2	-4.05889	0.992094	ABC transporter G family member 9 (AHRD V1 ***- AB9G_ARATH)
Solyc09g092200.1.1	25.64	1.49	-4.05889	0.988353	Nuclear movement protein nudc (AHRD V1 ***- Q17KI6_AEDAE)
Solyc12g010000.1.1	24.38	1.45	-4.05889	0.987061	Early nodulin-55-1 (Fragment) (AHRD V1 *--- NO551_SOYBN)
Solyc06g065930.2.1	22.83	1.4	-4.05889	0.985211	C15orf24 homolog (AHRD V1 ***- C1BJZ2_OSMMO)
Solyc05g014530.1.1	21.67	1.3	-4.05889	0.983613	Histidine amino acid transporter (AHRD V1 **** Q85V22_ORYSI)
Solyc12g098560.1.1	21.1	1.19	-4.05889	0.982902	Glucan endo-1 3-beta-glucosidase A6 (AHRD V1 ***- B6TIF7_MAIZE)
Solyc02g033090.1.1	21.04	1.17	-4.05889	0.982802	Unknown Protein (AHRD V1)
Solyc07g015920.1.1	20.96	1.17	-4.05889	0.982672	Expressed protein (Fragment) (AHRD V1 *-*- B3VV43_POPTN)
Solyc05g008720.1.1	16.77	1	-4.05889	0.97299	Unknown Protein (AHRD V1)
Solyc04g064710.2.1	16.01	0.93	-4.05889	0.970616	Alcohol dehydrogenase 2 (AHRD V1 **** Q9FZ01_VITVI)
Solyc08g078580.1.1	15.74	0.91	-4.05889	0.969671	Nodulin-like protein (AHRD V1 *-*- Q9FGL0_ARATH)
Solyc01g017870.1.1	13	0.73	-4.05889	0.956844	Unknown Protein (AHRD V1)
Solyc06g074150.2.1	13.02	0.77	-4.05889	0.956617	LRR receptor-like serine/threonine-protein kinase, RLP
Solyc03g031740.1.1	12.79	0.76	-4.05889	0.955099	Glucose-6-phosphate/phosphate translocator 2 (AHRD V1 **** D7KVF2_ARALY)
Solyc04g072580.1.1	12.66	0.78	-4.05889	0.954129	6-phosphofructokinase 2 (AHRD V1 ***- B6TE72_MAIZE)
Solyc09g061960.2.1	181.26	9.1	-4.32193	0.999909	Late embryogenesis abundant protein (AHRD V1 ***- Q2HV86_MEDTR)
Solyc01g060070.2.1	167.55	8.63	-4.32193	0.999887	Pore protein homolog (AHRD V1 **-- Q3EA11_ARATH)
Solyc10g008820.2.1	144.49	6.53	-4.32193	0.999864	GDSL esterase/lipase At5g45960 (AHRD V1 ***- GDL86_ARATH)
Solyc01g112230.2.1	116.35	5.54	-4.32193	0.999769	PGPS/NH21 (AHRD V1 **-- Q9ZTM1_PETHY)
Solyc11g071900.1.1	107.38	5.15	-4.32193	0.999711	Self-incompatibility protein (Fragment) (AHRD V1 ***- C7FE99_9MAGN)
Solyc00g171710.1.1	101.98	4.94	-4.32193	0.999652	Unknown Protein (AHRD V1)
Solyc03g097100.1.1	81.53	4.33	-4.32193	0.999323	Calmodulin (AHRD V1 ***- B6UHC3_MAIZE)
Solyc08g076780.1.1	51.94	2.58	-4.32193	0.997885	Cinnamoyl-CoA reductase (AHRD V1 ***- Q3SCM6_9FABA)
Solyc08g013680.2.1	44.22	2.23	-4.32193	0.996733	Inorganic pyrophosphatase (AHRD V1 ***- Q2HTA8_MEDTR)
Solyc05g049870.2.1	43.17	2.08	-4.32193	0.996552	Cysteine and glycine-rich protein 2 (AHRD V1 **-- B5X6P9_SALSA)
Solyc03g070390.2.1	39.25	1.82	-4.32193	0.995688	Alpha-1 4-glucan-protein synthase (AHRD V1 **-* B9RLK7_RICCO)
Solyc03g116620.2.1	27.92	1.31	-4.32193	0.990565	Phospholipase D (AHRD V1 **** D2E4A5_9ROSI)
Solyc04g008000.2.1	26.07	1.35	-4.32193	0.988967	Calmodulin (AHRD V1 ***- D9J0A7_9ROSI)
Solyc02g065150.1.1	20.47	1	-4.32193	0.982173	LOB domain family protein (AHRD V1 ***- D7LG10_ARALY)
Solyc12g098180.1.1	20.27	1.02	-4.32193	0.981772	Vesicle-associated membrane protein 7B (AHRD V1 ***- D7KE74_ARALY)
Solyc10g007530.1.1	18.54	0.92	-4.32193	0.978335	Genomic DNA chromosome 3 P1 clone MLD14 (AHRD V1 ***- Q9LT83_ARATH)
Solyc07g008410.2.1	18.08	0.99	-4.32193	0.976917	Multidrug and toxin extrusion protein 1 (AHRD V1 **-- S47A1_MOUSE)
Solyc12g017390.1.1	17.03	0.83	-4.32193	0.974406	Protein kinase (AHRD V1 ***- Q41297_9SOLN)
Solyc01g091300.2.1	14.18	0.69	-4.32193	0.96367	Sec1-4 syntaxin-binding protein (AHRD V1 **-* Q3SEP7_PARTE)
Solyc12g089330.1.1	13.93	0.74	-4.32193	0.962196	Synaptotagmin (AHRD V1 *--- B0W3L1_CULQU)
Solyc12g010810.1.1	13.25	0.61	-4.32193	0.959203	LOB domain family protein (AHRD V1 *-*- D7L292_ARALY)
Solyc08g066510.2.1	13.22	0.68	-4.32193	0.958517	GATA transcription factor 9 (AHRD V1 *-*- B6STZ1_MAIZE)
Solyc06g071650.1.1	13.1	0.7	-4.32193	0.957747	AP-1 complex subunit mu (AHRD V1 ***- Q7RVT3_NEUCR)
Solyc06g008990.1.1	12.41	0.64	-4.32193	0.953339	Unknown Protein (AHRD V1)
Solyc07g055780.2.1	12.23	0.67	-4.32193	0.951883	Os06g0207500 protein (Fragment) (AHRD V1 ***- Q0DDQ9_ORYSJ)
Solyc06g083950.1.1	11.97	0.63	-4.32193	0.950153	Unknown Protein (AHRD V1)
Solyc09g091040.2.1	482.78	19.73	-4.64386	0.999992	Late embryogenesis-abundant protein (AHRD V1 ***- Q5Q032_CHOBU)
Solyc07g044870.2.1	358.24	13.27	-4.64386	0.999981	Polygalacturonase (AHRD V1 ***- Q9MBC0_SALGI)
Solyc03g031500.1.1	425.76	18.7	-4.64386	0.999977	HR7 protein (AHRD V1 ***- Q9SXP0_HYONI)
Solyc10g045580.1.1	400.85	17.73	-4.64386	0.999975	Cytochrome c oxidase subunit VC family protein (AHRD V1 ***- D7LT63_ARALY)
Solyc02g089170.2.1	302.62	11.39	-4.64386	0.999972	Alpha-1 4-glucan-protein synthase (AHRD V1 **-* B9RLK7_RICCO)
Solyc08g083370.2.1	114.87	4.83	-4.64386	0.999773	Inorganic pyrophosphatase (AHRD V1 **** Q2HTA8_MEDTR)
Solyc04g056360.2.1	76.27	3.32	-4.64386	0.999242	WRKY transcription factor 78 (AHRD V1 *-** Q5HZ67_ORYSA)
Solyc02g063340.1.1	50.99	2.23	-4.64386	0.997813	Calmodulin 4 (AHRD V1 **-- Q6WEH7_MOUSE)
Solyc08g079910.1.1	43.69	1.65	-4.64386	0.99675	Subtilisin-like protease (AHRD V1 **-- Q9LWA3_SOLLC)
Solyc01g010500.1.1	42.32	1.69	-4.64386	0.996453	Ein3-binding f-box protein 3 (AHRD V1 *-*- B9HA53_POPTR)
Solyc01g103900.2.1	38.25	1.61	-4.64386	0.99544	Phospholipase D (AHRD V1 ***- Q9LKM1_ORYSI)
Solyc04g011340.2.1	33.69	1.28	-4.64386	0.993962	Nodulin-like protein (AHRD V1 ***- Q9ZUS1_ARATH)
Solyc04g071690.2.1	30.77	1.12	-4.64386	0.992559	Ribonuclease P protein subunit p25 (AHRD V1 *--- RPP25_HUMAN)
Solyc02g082750.2.1	23.18	0.82	-4.64386	0.986481	Phosphatidylinositol phosphate (PtdInsP) phosphatase involved in hydrolysis of PtdIns (AHRD V1 **** D6VWZ1_YEAST)
Solyc06g008530.1.1	23.17	0.87	-4.64386	0.986407	Myosin XI (AHRD V1 ***- Q5R216_TOBAC)
Solyc06g069870.2.1	20.78	0.82	-4.64386	0.982985	Dehydration-responsive family protein (AHRD V1 ***- D7KPN7_ARALY)
Solyc03g025780.2.1	19.23	0.73	-4.64386	0.980231	Glycosyltransferase CAZy family GT90 (Fragment) (AHRD V1 **-- D8SQN9_SELML)
Solyc08g076800.2.1	18.56	0.73	-4.64386	0.978779	Ring H2 finger protein (AHRD V1 *-*- D9ZHD8_HYPPE)
Solyc06g066410.2.1	18.26	0.71	-4.64386	0.978163	Profilin (AHRD V1 ***- Q9SMC0_TOBAC)
Solyc08g066170.2.1	15.96	0.65	-4.64386	0.971442	Unknown Protein (AHRD V1)
Solyc06g082340.1.1	15.56	0.56	-4.64386	0.970338	F-box family protein (AHRD V1 ***- D7L4T6_ARALY)
Solyc01g087070.2.1	404.51	12.99	-5.05889	0.999987	Mitochondrial ADP/ATP carrier proteins (AHRD V1 **** Q2UU95_ASPOR)
Solyc03g116400.2.1	398.7	13.86	-5.05889	0.999983	Unknown Protein (AHRD V1)
Solyc02g085150.2.1	338.93	11.12	-5.05889	0.999979	LEA-like protein (AHRD V1 *-*- Q8L5P5_LILLO)
Solyc03g063150.2.1	349.4	11	-5.05889	0.999979	Laccase-2 (AHRD V1 **-- LAC2_ORYSJ)
Solyc02g078370.1.1	307.04	9.23	-5.05889	0.999975	Anther-specific protein TA-29 (AHRD V1 ***- TA29_TOBAC)
Solyc05g051250.2.1	271.66	8.71	-5.05889	0.99997	Glutamine synthetase (AHRD V1 ***- A9PB10_POPTR)
Solyc08g006810.1.1	285.3	8.72	-5.05889	0.99997	Fasciclin-like arabinogalactan protein 17 (AHRD V1 *-*- A9XTM2_GOSHI)
Solyc10g086460.1.1	291.5	9.83	-5.05889	0.99997	Actin (AHRD V1 ***- Q9SAR7_STRAF)
Solyc11g042850.1.1	279.33	9.61	-5.05889	0.999968	5-dehydro-2-deoxygluconokinase (AHRD V1 **-- IOLC_GEOTN)
Solyc03g006170.2.1	220.51	5.77	-5.05889	0.999958	Pollen allergen Phl p 11 (AHRD V1 ***- B6TNI5_MAIZE)
Solyc12g099480.1.1	189.77	5.89	-5.05889	0.99994	Bifunctional polymyxin resistance protein ArnA (AHRD V1 **-- ARNA_PHOLL)
Solyc01g111540.2.1	172.06	5.29	-5.05889	0.999926	Beta-galactosidase (AHRD V1 **** B2LYJ4_PETHY)
Solyc01g097050.2.1	149.79	5.01	-5.05889	0.999892	Nucleic acid binding protein (AHRD V1 *-*- D7L2W2_ARALY)
Solyc01g066700.2.1	118.96	3.1	-5.05889	0.999803	Bifunctional polymyxin resistance protein ArnA (AHRD V1 **-- ARNA_SALPC)
Solyc01g066710.2.1	115.82	4	-5.05889	0.999781	Unknown Protein (AHRD V1)
Solyc04g051720.2.1	114.11	3.23	-5.05889	0.999781	Genomic DNA chromosome 5 P1 clone MXK3 (AHRD V1 ***- Q9LV95_ARATH)
Solyc02g065740.2.1	110.77	3.01	-5.05889	0.999764	Alpha-1 4-glucan-protein synthase (UDP-forming) (AHRD V1 **-* Q2HV87_MEDTR)
Solyc10g078760.1.1	104.29	2.75	-5.05889	0.999715	Seed maturation protein LEA 4 (AHRD V1 ***- Q941M2_9FABA)
Solyc01g010360.2.1	95.94	2.45	-5.05889	0.999616	14-3-3-like protein GF14 epsilon (AHRD V1 **-- 14310_ARATH)
Solyc01g108310.2.1	90.73	2.37	-5.05889	0.999558	Os11g0248200 protein (Fragment) (AHRD V1 *--- Q0ITJ6_ORYSJ)
Solyc05g012420.2.1	77.74	2.68	-5.05889	0.999304	14-3-3 protein sigma gamma zeta beta/alpha (AHRD V1 **-- Q16QZ7_AEDAE)
Solyc02g078190.2.1	62.56	1.78	-5.05889	0.998745	V-type proton ATPase subunit G (AHRD V1 **** VATG_CITLI)
Solyc05g008020.2.1	53.6	1.75	-5.05889	0.998159	Mitogen-activated protein kinase (AHRD V1 **** A9RAB3_WHEAT)
Solyc03g113360.2.1	51.02	1.66	-5.05889	0.9979	LOB domain family protein (AHRD V1 *-*- D7L292_ARALY)
Solyc08g013740.2.1	46.11	1.44	-5.05889	0.997185	Dehydration-responsive family protein (AHRD V1 ***- D7KIG1_ARALY)
Solyc03g079970.1.1	39.63	1.11	-5.05889	0.995969	Unknown Protein (AHRD V1)
Solyc01g010980.1.1	36.74	0.92	-5.05889	0.995191	Unknown Protein (AHRD V1)
Solyc09g090310.1.1	31.77	1	-5.05889	0.993185	Glycolipid transfer protein domain-containing protein 1 (AHRD V1 **-* GLTD1_MOUSE)
Solyc12g036900.1.1	30.53	0.9	-5.05889	0.99255	Unknown Protein (AHRD V1)
Solyc12g057010.1.1	29	0.87	-5.05889	0.991676	Transporter major facilitator family (AHRD V1 **-- B5IUM5_9EURY)
Solyc01g103910.1.1	27.49	0.79	-5.05889	0.990636	Phospholipase D (AHRD V1 **** Q6AVR2_ORYSJ)
Solyc12g098930.1.1	24.02	0.79	-5.05889	0.987479	Pyruvate dehydrogenase kinase (AHRD V1 ***- Q700B0_CICAR)
Solyc08g059750.1.1	23.56	0.66	-5.05889	0.987075	At1g04280-like protein (Fragment) (AHRD V1 *-*- B0FVI9_ARALY)
Solyc06g075210.2.1	23.24	0.65	-5.05889	0.986723	Protein disulfide isomerase L-2 (AHRD V1 **** B1Q2X5_SOYBN)
Solyc03g119410.1.1	21.78	0.64	-5.05889	0.984902	Unknown Protein (AHRD V1)
Solyc03g080000.1.1	21.09	0.58	-5.05889	0.983931	DUF599 family protein (AHRD V1 ***- Q8T1D5_DICDI)
Solyc09g010730.1.1	16.35	0.42	-5.05889	0.973527	Unknown Protein (AHRD V1)
Solyc06g051000.2.1	15.37	0.42	-5.05889	0.970206	Dehydration-responsive family protein (AHRD V1 **-- D7LF23_ARALY)
Solyc10g079400.1.1	15.37	0.48	-5.05889	0.969981	Gelsolin (Fragment) (AHRD V1 *--- C0PU67_SALSA)
Solyc12g010530.1.1	15.18	0.38	-5.05889	0.969584	Clathrin assembly protein (AHRD V1 ***- B6TW95_MAIZE)
Solyc08g015680.1.1	14.46	0.44	-5.05889	0.966334	Potassium transporter 2 (AHRD V1 **** B6U7Z6_MAIZE)
Solyc05g008730.1.1	14.45	0.43	-5.05889	0.966287	EIN3-binding F-box protein 1 (AHRD V1 ***- Q2PQJ1_SOLLC)
Solyc04g071760.2.1	13.81	0.35	-5.05889	0.963472	Hypothetical membrane protein (AHRD V1 **-- Q2LSQ3_SYNAS)
Solyc10g076640.1.1	13.75	0.45	-5.05889	0.962757	F-box/kelch-repeat protein At3g06240 (AHRD V1 -**- FBK50_ARATH)
Solyc06g082740.2.1	13.45	0.34	-5.05889	0.961765	Reticulon family protein (AHRD V1 ***- B2WS91_9BRAS)
Solyc05g051980.2.1	13.19	0.46	-5.05889	0.959721	Annexin 2 (AHRD V1 ***- A9X4R2_BRAJU)
Solyc05g005720.2.1	13.13	0.43	-5.05889	0.959553	Potassium transporter family protein (AHRD V1 **** D7KXB7_ARALY)
Solyc05g008710.1.1	12.86	0.36	-5.05889	0.958294	Unknown Protein (AHRD V1)
Solyc02g082990.2.1	549.65	11.47	-5.64386	0.999998	ABA-inducible protein-like protein (AHRD V1 **-- A8IXE3_BRACM)
Solyc02g089580.2.1	527.14	9.33	-5.64386	0.999996	Unknown Protein (AHRD V1)
Solyc02g089590.2.1	529.43	8.13	-5.64386	0.999996	Pollen coat-like protein (AHRD V1 ***- Q8LAM9_ARATH)
Solyc05g005820.2.1	480.76	9.72	-5.64386	0.999994	Glyceraldehyde-3-phosphate dehydrogenase (AHRD V1 **** Q9XG67_TOBAC)
Solyc03g046320.2.1	398.68	6.84	-5.64386	0.999987	Pollen coat-like protein (AHRD V1 ***- Q8LAM9_ARATH)
Solyc06g008630.2.1	290.5	5.16	-5.64386	0.999974	Cysteine-rich protein (AHRD V1 ***- Q9SDN7_TOBAC)
Solyc02g084670.2.1	233.73	4.32	-5.64386	0.999964	Dehydration-responsive family protein (AHRD V1 **-- D7LF23_ARALY)
Solyc05g055750.2.1	233.82	3.64	-5.64386	0.999964	WRKY transcription factor-a (AHRD V1 *-** Q1XD53_CAPAN)
Solyc01g080950.2.1	153.3	2.48	-5.64386	0.999898	Unknown Protein (AHRD V1)
Solyc02g091130.2.1	133.87	2.85	-5.64386	0.999851	ATP synthase subunit beta (AHRD V1 ***- Q9ZR78_NICSY)
Solyc09g048990.2.1	133.35	2.98	-5.64386	0.999851	V-type proton ATPase subunit E (AHRD V1 **** D3PGM0_9MAXI)
Solyc01g056360.2.1	129.93	2.27	-5.64386	0.999839	Unknown Protein (AHRD V1)
Solyc01g105810.2.1	114.62	2.08	-5.64386	0.999784	Rab-GDP dissociation inhibitor (AHRD V1 **** A5CKE3_SOLLC)
Solyc10g007380.1.1	87.47	1.7	-5.64386	0.99951	Multidrug resistance protein mdtK (AHRD V1 ***- MDTK_CITK8)
Solyc07g053460.2.1	75.02	1.37	-5.64386	0.999266	Cathepsin B-like cysteine proteinase (AHRD V1 **-* CYSP_SCHMA)
Solyc09g009750.1.1	65.88	1.13	-5.64386	0.998947	Subtilisin-like serine protease (AHRD V1 **-* Q8L7D2_ARATH)
Solyc06g082130.2.1	38.58	0.66	-5.64386	0.995811	Pyruvate decarboxylase 2 (AHRD V1 **** Q5BN15_PETHY)
Solyc05g052330.1.1	38.12	0.84	-5.64386	0.995635	Expansin-b5 (AHRD V1 ***- D7LRS2_ARALY)
Solyc06g065830.1.1	36.55	0.69	-5.64386	0.995208	Transmembrane 9 superfamily protein member 2 (AHRD V1 ***- B6ST61_MAIZE)
Solyc05g008740.1.1	34.06	0.72	-5.64386	0.994334	RNA-dependent RNA polymerase (AHRD V1 ***- B3TNC1_9SOLA)
Solyc06g005180.1.1	33.48	0.63	-5.64386	0.99416	Zinc finger family protein (AHRD V1 *-*- D7MD22_ARALY)
Solyc09g090590.2.1	32.55	0.51	-5.64386	0.993792	Calcium binding protein Caleosin (AHRD V1 **** A8N0P5_COPC7)
Solyc09g083100.1.1	27.56	0.67	-5.64386	0.99081	CBL-interacting protein kinase 20 (AHRD V1 **** C4P7W9_VITVI)
Solyc11g065400.1.1	25.17	0.4	-5.64386	0.989045	Glycosyltransferase-like protein (AHRD V1 **-- D8RX86_SELML)
Solyc01g091410.2.1	25.15	0.56	-5.64386	0.988873	Acetyl esterase (AHRD V1 *--- AES_ECOLC)
Solyc02g078430.2.1	23.43	0.36	-5.64386	0.987283	Unknown Protein (AHRD V1)
Solyc05g046110.2.1	23	0.44	-5.64386	0.986676	Glycosyltransferase-like protein (AHRD V1 **-- D8QTD2_SELML)
Solyc12g005890.1.1	20.11	0.48	-5.64386	0.982418	Myb-related transcription factor (AHRD V1 *-*- B7UCQ7_PANGI)
Solyc12g006410.1.1	19.04	0.4	-5.64386	0.980524	UDP-glucose 4-epimerase (AHRD V1 ***- B3XXH6_9BACT)
Solyc10g081800.1.1	18.31	0.41	-5.64386	0.97893	Phosphatidylglycerol/phosphatidylinositol transfer protein (AHRD V1 ***- C5M4G5_CANTT)
Solyc05g008700.1.1	16.84	0.31	-5.64386	0.975285	EIN3-binding F-box protein 1 (AHRD V1 *-*- Q2PQJ1_SOLLC)
Solyc07g015910.2.1	13.77	0.3	-5.64386	0.963525	MtN21 nodulin protein-like (AHRD V1 ***- B6TBZ6_MAIZE)
Solyc10g018920.1.1	11.65	0.27	-5.64386	0.950493	Cell number regulator 6 (AHRD V1 **-- B6SGC5_MAIZE)
Solyc06g075270.2.1	679.24	4.32	-6.64386	1	Convicilin (Fragment) (AHRD V1 **-- B0BCK6_9FABA)
Solyc06g075290.2.1	831.02	4.98	-6.64386	1	7S globulin-3 (Fragment) (AHRD V1 **-- A4PIA0_PHAAN)
Solyc02g089570.2.1	461.46	2.35	-6.64386	0.999994	Unknown Protein (AHRD V1)
Solyc06g075320.2.1	488.1	3.54	-6.64386	0.999994	Vicilin (Fragment) (AHRD V1 **-- Q41726_ZAMFU)
Solyc03g031480.2.1	377.33	4.43	-6.64386	0.999983	HR7 protein (AHRD V1 ***- Q9SXP0_HYONI)
Solyc02g065640.2.1	306.31	3.97	-6.64386	0.999975	ABA-inducible protein-like protein (AHRD V1 ***- A8IXE3_BRACM)
Solyc06g059970.2.1	204.97	2.67	-6.64386	0.999951	MADS box transcription factor (AHRD V1 ***- A7LK41_POPDE)
Solyc10g007370.1.1	121.95	1.71	-6.64386	0.999822	Multidrug resistance protein mdtK (AHRD V1 ***- MDTK_CITK8)
Solyc12g042850.1.1	114.04	0.66	-6.64386	0.999788	Unknown Protein (AHRD V1)
Solyc07g054670.2.1	106.84	1.2	-6.64386	0.999754	NADH dehydrogenase like protein (AHRD V1 **** O65414_ARATH)
Solyc06g035520.2.1	97.14	1.2	-6.64386	0.99965	Acetyl esterase (AHRD V1 *--- AES_SALSV)
Solyc09g009930.1.1	92.94	1.05	-6.64386	0.999592	Unknown Protein (AHRD V1)
Solyc09g055250.2.1	60.67	0.54	-6.64386	0.998711	Reticulon family protein (AHRD V1 ***- B2WS91_9BRAS)
Solyc10g044700.1.1	59.87	0.49	-6.64386	0.998671	EF hand family protein expressed (AHRD V1 ***- Q852G4_ORYSJ)
Solyc10g086670.1.1	53.51	0.39	-6.64386	0.998253	Universal stress protein 1 (AHRD V1 ***- B0YQX0_GOSAR)
Solyc05g054270.2.1	53.38	0.8	-6.64386	0.998215	Universal stress protein (AHRD V1 ***- B4UW73_ARAHY)
Solyc02g083440.2.1	47.66	0.48	-6.64386	0.997588	Unknown Protein (AHRD V1)
Solyc01g005360.2.1	46.73	0.46	-6.64386	0.997436	S-adenosyl-L-methionine salicylic acid carboxyl methyltransferase (AHRD V1 **** A7XZE9_9MAGN)
Solyc10g018060.1.1	44.16	0.58	-6.64386	0.997009	Elicitor-responsive protein 3 (AHRD V1 *--- B6U4Y1_MAIZE)
Solyc09g098120.2.1	42.93	0.22	-6.64386	0.996856	DUF1264 domain protein (AHRD V1 **-- B8NLT6_ASPFN)
Solyc06g007500.1.1	39.6	0.49	-6.64386	0.996104	Ubiquitin-conjugating enzyme E2 11 (AHRD V1 *-*- UBC11_ARATH)
Solyc12g017310.1.1	34.13	0.37	-6.64386	0.994512	DCN1-like protein 2 (AHRD V1 ***- B6TM27_MAIZE)
Solyc01g005310.2.1	33.56	0.45	-6.64386	0.994266	Dynamin like protein (AHRD V1 ***- D3BTL7_POLPA)
Solyc10g062110.1.1	33.24	0.37	-6.64386	0.994168	Sugar transporter family protein expressed (AHRD V1 ***- Q2R0I8_ORYSJ)
Solyc02g092960.1.1	32.14	0.45	-6.64386	0.993637	Unknown Protein (AHRD V1)
Solyc06g059820.1.1	29.45	0.35	-6.64386	0.992207	F-box (AHRD V1 ***- Q84KQ8_PRUMU)
Solyc12g098140.1.1	29.03	0.26	-6.64386	0.992041	Unknown Protein (AHRD V1)
Solyc06g075280.2.1	27.69	0.18	-6.64386	0.991289	Vicilin (Fragment) (AHRD V1 **-- B4X640_PISVE)
Solyc11g020290.1.1	25.71	0.23	-6.64386	0.989716	Histone-binding protein RBBP7 (AHRD V1 *-*- D0NGC2_PHYIN)
Solyc07g054640.1.1	25.06	0.22	-6.64386	0.989099	NADH dehydrogenase like protein (AHRD V1 **** O65414_ARATH)
Solyc10g007240.1.1	24.42	0.27	-6.64386	0.988392	Tetratricopeptide repeat protein 2-like (AHRD V1 **-- Q5ZDK5_ORYSJ)
Solyc07g024030.2.1	22.45	0.13	-6.64386	0.986421	Solute carrier family 2, facilitated glucose transporter member 2 (AHRD V1 ***- GTR2_HUMAN)
Solyc07g014660.1.1	22.16	0.24	-6.64386	0.985887	AT hook motif family protein (AHRD V1 ***- B6THS5_MAIZE)
Solyc01g086840.1.1	18.02	0.27	-6.64386	0.978607	Thaumatin-like protein (AHRD V1 ***- Q5DWG1_CRYJA)
Solyc05g051320.1.1	15.83	0.1	-6.64386	0.972875	Post-GPI attachment to proteins factor 3 (AHRD V1 **-- PGAP3_MOUSE)
Solyc02g030470.1.1	15.54	0.1	-6.64386	0.971822	Serine/threonine-protein phosphatase 7 long form homolog (AHRD V1 *--- PPP7L_ARATH)
Solyc04g072130.1.1	15.41	0.22	-6.64386	0.971009	Programmed cell death 4a (AHRD V1 *--- D3TLD2_GLOMM)
Solyc02g065100.1.1	14.04	0.16	-6.64386	0.965653	Patatin-like protein 3 (AHRD V1 ***- Q9FZ08_TOBAC)
Solyc03g006200.1.1	13.49	0.11	-6.64386	0.96312	Cathepsin B-like cysteine proteinase 5 (AHRD V1 **-* CPR5_CAEEL)
Solyc12g006090.1.1	13.54	0.15	-6.64386	0.96312	Transmembrane emp24 domain-containing protein 3 (AHRD V1 ***- B6TE63_MAIZE)
Solyc10g037940.1.1	12.76	0.12	-6.64386	0.959158	Unknown Protein (AHRD V1)
